# Supplementary material
Source: publisher figshare collection journal article supplement (https://acs.figshare.com/ndownloader/files/4534510)
Supplement: Supplementary file 1 [file 4534510]

data_scw9

 

_audit_creation_method            SHELXL-97

_chemical_name_systematic

;

 ?

;

_chemical_name_common             ?

_chemical_melting_point           ?

_chemical_formula_moiety          'C60 H66 Li4 N2 O P4 S2 Si2, C3 H7'

_chemical_formula_sum

 'C63 H73 Li4 N2 O P4 S2 Si2'

_chemical_formula_weight          1146.17

 

loop_

 _atom_type_symbol

 _atom_type_description

 _atom_type_scat_dispersion_real

 _atom_type_scat_dispersion_imag

 _atom_type_scat_source

 'C'  'C'   0.0033   0.0016

 'International Tables Vol C Tables 4.2.6.8 and 6.1.1.4'

 'H'  'H'   0.0000   0.0000

 'International Tables Vol C Tables 4.2.6.8 and 6.1.1.4'

 'Li'  'Li'  -0.0003   0.0001

 'International Tables Vol C Tables 4.2.6.8 and 6.1.1.4'

 'N'  'N'   0.0061   0.0033

 'International Tables Vol C Tables 4.2.6.8 and 6.1.1.4'

 'Si'  'Si'   0.0817   0.0704

 'International Tables Vol C Tables 4.2.6.8 and 6.1.1.4'

 'P'  'P'   0.1023   0.0942

 'International Tables Vol C Tables 4.2.6.8 and 6.1.1.4'

 'S'  'S'   0.1246   0.1234

 'International Tables Vol C Tables 4.2.6.8 and 6.1.1.4'

 'O'  'O'   0.0106   0.0060

 'International Tables Vol C Tables 4.2.6.8 and 6.1.1.4'

 

_symmetry_cell_setting            Monoclinic

_symmetry_space_group_name_H-M    C2/c

 

loop_

 _symmetry_equiv_pos_as_xyz

 'x, y, z'

 '-x, y, -z+1/2'

 'x+1/2, y+1/2, z'

 '-x+1/2, y+1/2, -z+1/2'

 '-x, -y, -z'

 'x, -y, z-1/2'

 '-x+1/2, -y+1/2, -z'

 'x+1/2, -y+1/2, z-1/2'

 

_cell_length_a                    41.092(2)

_cell_length_b                    12.5386(5)

_cell_length_c                    27.4618(14)

_cell_angle_alpha                 90.00

_cell_angle_beta                  114.819(3)

_cell_angle_gamma                 90.00

_cell_volume                      12842.5(11)

_cell_formula_units_Z             8

_cell_measurement_temperature     173(2)

_cell_measurement_reflns_used     2582

_cell_measurement_theta_min       2.21

_cell_measurement_theta_max       19.17

 

_exptl_crystal_description        needle

_exptl_crystal_colour             colourless

_exptl_crystal_size_max           0.40

_exptl_crystal_size_mid           0.10

_exptl_crystal_size_min           0.06

_exptl_crystal_density_meas       ?

_exptl_crystal_density_diffrn     1.186

_exptl_crystal_density_method     'not measured'

_exptl_crystal_F_000              4840

_exptl_absorpt_coefficient_mu     0.260

_exptl_absorpt_correction_type    multi-scan

_exptl_absorpt_correction_T_min   0.9031

_exptl_absorpt_correction_T_max   0.9846

_exptl_absorpt_process_details    sadabs

 

_exptl_special_details

;

 ?

;

 

_diffrn_ambient_temperature       173(2)

_diffrn_radiation_wavelength      0.71073

_diffrn_radiation_type            MoK\a

_diffrn_radiation_source          'fine-focus sealed tube'

_diffrn_radiation_monochromator   graphite

_diffrn_measurement_device_type   'CCD area detector'

_diffrn_measurement_method        'phi and omega scans'

_diffrn_detector_area_resol_mean  ?

_diffrn_standards_number          ?

_diffrn_standards_interval_count  ?

_diffrn_standards_interval_time   ?

_diffrn_standards_decay_%         ?

_diffrn_reflns_number             43672

_diffrn_reflns_av_R_equivalents   0.1220

_diffrn_reflns_av_sigmaI/netI     0.1287

_diffrn_reflns_limit_h_min        -48

_diffrn_reflns_limit_h_max        49

_diffrn_reflns_limit_k_min        -14

_diffrn_reflns_limit_k_max        14

_diffrn_reflns_limit_l_min        -32

_diffrn_reflns_limit_l_max        32

_diffrn_reflns_theta_min          1.09

_diffrn_reflns_theta_max          25.20

_reflns_number_total              11367

_reflns_number_gt                 5873

_reflns_threshold_expression      >2sigma(I)

 

_computing_data_collection        'Bruker SMART'

_computing_cell_refinement        'Bruker SMART'

_computing_data_reduction         'Bruker SAINT'

_computing_structure_solution     'SHELXS-97 (Sheldrick, 1990)'

_computing_structure_refinement   'SHELXL-97 (Sheldrick, 1997)'

_computing_molecular_graphics     'Bruker SHELXTL'

_computing_publication_material   'Bruker SHELXTL'

 

_refine_special_details

;

 Refinement of F^2^ against ALL reflections.  The weighted R-factor wR and

 goodness of fit S are based on F^2^, conventional R-factors R are based

 on F, with F set to zero for negative F^2^. The threshold expression of

 F^2^ > 2sigma(F^2^) is used only for calculating R-factors(gt) etc. and is

 not relevant to the choice of reflections for refinement.  R-factors based

 on F^2^ are statistically about twice as large as those based on F, and R-

 factors based on ALL data will be even larger.

;

 

_refine_ls_structure_factor_coef  Fsqd

_refine_ls_matrix_type            full

_refine_ls_weighting_scheme       calc

_refine_ls_weighting_details

 'calc w=1/[\s^2^(Fo^2^)+(0.1329P)^2^+0.0000P] where P=(Fo^2^+2Fc^2^)/3'

_atom_sites_solution_primary      direct

_atom_sites_solution_secondary    difmap

_atom_sites_solution_hydrogens    geom

_refine_ls_hydrogen_treatment     constr

_refine_ls_extinction_method      none

_refine_ls_extinction_coef        ?

_refine_ls_number_reflns          11367

_refine_ls_number_parameters      811

_refine_ls_number_restraints      474

_refine_ls_R_factor_all           0.1522

_refine_ls_R_factor_gt            0.0674

_refine_ls_wR_factor_ref          0.2477

_refine_ls_wR_factor_gt           0.1723

_refine_ls_goodness_of_fit_ref    1.000

_refine_ls_restrained_S_all       0.987

_refine_ls_shift/su_max           0.000

_refine_ls_shift/su_mean          0.000

 

loop_

 _atom_site_label

 _atom_site_type_symbol

 _atom_site_fract_x

 _atom_site_fract_y

 _atom_site_fract_z

 _atom_site_U_iso_or_equiv

 _atom_site_adp_type

 _atom_site_occupancy

 _atom_site_symmetry_multiplicity

 _atom_site_calc_flag

 _atom_site_refinement_flags

 _atom_site_disorder_assembly

 _atom_site_disorder_group

C1 C 0.1198(5) 0.0869(11) 0.1720(5) 0.032(4) Uani 0.60(3) 1 d PDU A 1

C2 C 0.1291(6) -0.0162(12) 0.1632(8) 0.055(5) Uani 0.60(3) 1 d PDU A 1

H2 H 0.1192 -0.0438 0.1277 0.065 Uiso 0.60(3) 1 calc PR A 1

C3 C 0.1521(6) -0.0784(14) 0.2040(9) 0.070(6) Uani 0.60(3) 1 d PDU A 1

H3 H 0.1576 -0.1486 0.1969 0.084 Uiso 0.60(3) 1 calc PR A 1

C4 C 0.1669(6) -0.0392(18) 0.2549(8) 0.084(6) Uani 0.60(3) 1 d PDU A 1

H4 H 0.1830 -0.0824 0.2832 0.101 Uiso 0.60(3) 1 calc PR A 1

C5 C 0.1589(5) 0.064(2) 0.2661(6) 0.082(6) Uani 0.60(3) 1 d PDU A 1

H5 H 0.1696 0.0911 0.3016 0.098 Uiso 0.60(3) 1 calc PR A 1

C6 C 0.1349(5) 0.1246(16) 0.2241(4) 0.049(4) Uani 0.60(3) 1 d PDU A 1

H6 H 0.1287 0.1939 0.2314 0.059 Uiso 0.60(3) 1 calc PR A 1

C1A C 0.1195(8) 0.0716(16) 0.1643(7) 0.042(7) Uani 0.40(3) 1 d PDU A 2

C2A C 0.1276(8) -0.0263(14) 0.1482(10) 0.039(6) Uani 0.40(3) 1 d PDU A 2

H2A H 0.1203 -0.0395 0.1110 0.047 Uiso 0.40(3) 1 calc PR A 2

C3A C 0.1458(9) -0.1044(19) 0.1842(12) 0.063(7) Uani 0.40(3) 1 d PDU A 2

H3A H 0.1513 -0.1706 0.1726 0.075 Uiso 0.40(3) 1 calc PR A 2

C4A C 0.1559(8) -0.084(2) 0.2377(11) 0.070(8) Uani 0.40(3) 1 d PDU A 2

H4A H 0.1677 -0.1389 0.2629 0.084 Uiso 0.40(3) 1 calc PR A 2

C5A C 0.1496(7) 0.013(2) 0.2567(8) 0.062(7) Uani 0.40(3) 1 d PDU A 2

H5A H 0.1582 0.0278 0.2940 0.074 Uiso 0.40(3) 1 calc PR A 2

C6A C 0.1302(9) 0.088(2) 0.2185(7) 0.057(7) Uani 0.40(3) 1 d PDU A 2

H6A H 0.1240 0.1537 0.2300 0.068 Uiso 0.40(3) 1 calc PR A 2

C7 C 0.06689(13) 0.2479(4) 0.1389(2) 0.0289(12) Uani 1 1 d . A .

C8 C 0.05076(15) 0.2007(5) 0.1694(2) 0.0403(15) Uani 1 1 d . . .

H8 H 0.0559 0.1285 0.1805 0.048 Uiso 1 1 calc R . .

C9 C 0.02738(16) 0.2586(5) 0.1836(2) 0.0464(16) Uani 1 1 d . . .

H9 H 0.0174 0.2270 0.2057 0.056 Uiso 1 1 calc R . .

C10 C 0.01856(16) 0.3627(5) 0.1657(2) 0.0462(16) Uani 1 1 d . . .

H10 H 0.0023 0.4022 0.1750 0.055 Uiso 1 1 calc R . .

C11 C 0.03330(15) 0.4082(5) 0.1346(2) 0.0444(16) Uani 1 1 d . . .

H11 H 0.0268 0.4787 0.1215 0.053 Uiso 1 1 calc R . .

C12 C 0.05772(14) 0.3520(4) 0.1222(2) 0.0351(14) Uani 1 1 d . . .

H12 H 0.0685 0.3857 0.1016 0.042 Uiso 1 1 calc R . .

C13 C 0.12152(13) 0.2447(4) 0.0934(2) 0.0262(12) Uani 1 1 d . A .

C14 C 0.19751(14) 0.2611(5) 0.1695(2) 0.0374(14) Uani 1 1 d . A .

C15 C 0.20146(16) 0.1559(5) 0.1597(2) 0.0470(16) Uani 1 1 d . . .

H15 H 0.1817 0.1191 0.1332 0.056 Uiso 1 1 calc R . .

C16 C 0.23340(18) 0.1013(6) 0.1872(3) 0.068(2) Uani 1 1 d . . .

H16 H 0.2356 0.0282 0.1799 0.081 Uiso 1 1 calc R . .

C17 C 0.26172(18) 0.1555(8) 0.2250(3) 0.069(2) Uani 1 1 d . . .

H17 H 0.2841 0.1205 0.2434 0.082 Uiso 1 1 calc R . .

C18 C 0.25785(17) 0.2603(8) 0.2363(3) 0.077(3) Uani 1 1 d . . .

H18 H 0.2774 0.2961 0.2636 0.092 Uiso 1 1 calc R . .

C19 C 0.22642(17) 0.3137(6) 0.2090(3) 0.064(2) Uani 1 1 d . . .

H19 H 0.2243 0.3865 0.2169 0.077 Uiso 1 1 calc R . .

C20 C 0.14801(14) 0.4233(4) 0.1705(2) 0.0320(13) Uani 1 1 d . A .

C21 C 0.13120(16) 0.5201(5) 0.1509(2) 0.0445(16) Uani 1 1 d . . .

H21 H 0.1255 0.5389 0.1147 0.053 Uiso 1 1 calc R . .

C22 C 0.12252(17) 0.5904(5) 0.1828(3) 0.0529(18) Uani 1 1 d . . .

H22 H 0.1116 0.6570 0.1687 0.064 Uiso 1 1 calc R . .

C23 C 0.12976(18) 0.5633(6) 0.2349(3) 0.0552(18) Uani 1 1 d . . .

H23 H 0.1235 0.6099 0.2568 0.066 Uiso 1 1 calc R . .

C24 C 0.14610(19) 0.4684(6) 0.2544(3) 0.0568(19) Uani 1 1 d . . .

H24 H 0.1511 0.4496 0.2904 0.068 Uiso 1 1 calc R . .

C25 C 0.15562(16) 0.3991(5) 0.2241(2) 0.0496(17) Uani 1 1 d . . .

H25 H 0.1674 0.3342 0.2394 0.059 Uiso 1 1 calc R . .

C26 C 0.22465(18) 0.4232(6) 0.0575(4) 0.079(3) Uani 1 1 d . A .

H26A H 0.2395 0.3756 0.0867 0.118 Uiso 1 1 calc R . .

H26B H 0.2398 0.4783 0.0523 0.118 Uiso 1 1 calc R . .

H26C H 0.2128 0.3819 0.0244 0.118 Uiso 1 1 calc R . .

C27 C 0.2138(2) 0.5694(7) 0.1379(3) 0.098(3) Uani 1 1 d . A .

H27A H 0.1964 0.5968 0.1506 0.147 Uiso 1 1 calc R . .

H27B H 0.2261 0.6294 0.1299 0.147 Uiso 1 1 calc R . .

H27C H 0.2314 0.5246 0.1657 0.147 Uiso 1 1 calc R . .

C28 C 0.16380(18) 0.5824(5) 0.0206(3) 0.0553(18) Uani 1 1 d . A .

H28A H 0.1521 0.5432 -0.0132 0.083 Uiso 1 1 calc R . .

H28B H 0.1800 0.6360 0.0170 0.083 Uiso 1 1 calc R . .

H28C H 0.1456 0.6178 0.0292 0.083 Uiso 1 1 calc R . .

C29 C 0.06033(13) 0.4402(4) -0.1244(2) 0.0277(12) Uani 1 1 d . A .

C30 C 0.07367(15) 0.5416(4) -0.1048(2) 0.0377(14) Uani 1 1 d . . .

H30 H 0.0772 0.5612 -0.0695 0.045 Uiso 1 1 calc R . .

C31 C 0.08176(17) 0.6136(5) -0.1363(3) 0.0500(17) Uani 1 1 d . . .

H31 H 0.0914 0.6816 -0.1222 0.060 Uiso 1 1 calc R . .

C32 C 0.07599(17) 0.5874(5) -0.1876(3) 0.0505(17) Uani 1 1 d . . .

H32 H 0.0813 0.6375 -0.2092 0.061 Uiso 1 1 calc R . .

C33 C 0.06258(17) 0.4895(5) -0.2079(2) 0.0490(17) Uani 1 1 d . . .

H33 H 0.0582 0.4724 -0.2438 0.059 Uiso 1 1 calc R . .

C34 C 0.05534(14) 0.4148(4) -0.1765(2) 0.0331(13) Uani 1 1 d . . .

H34 H 0.0469 0.3460 -0.1906 0.040 Uiso 1 1 calc R . .

C35 C 0.01523(13) 0.2657(4) -0.1201(2) 0.0260(12) Uani 1 1 d . A .

C36 C 0.01146(14) 0.1630(4) -0.1023(2) 0.0315(13) Uani 1 1 d . . .

H36 H 0.0309 0.1317 -0.0730 0.038 Uiso 1 1 calc R . .

C37 C -0.02012(16) 0.1078(5) -0.1270(3) 0.0430(15) Uani 1 1 d . . .

H37 H -0.0224 0.0386 -0.1147 0.052 Uiso 1 1 calc R . .

C38 C -0.04867(15) 0.1529(5) -0.1700(2) 0.0419(15) Uani 1 1 d . . .

H38 H -0.0708 0.1158 -0.1864 0.050 Uiso 1 1 calc R . .

C39 C -0.04476(14) 0.2503(4) -0.1884(2) 0.0359(14) Uani 1 1 d . . .

H39 H -0.0639 0.2794 -0.2189 0.043 Uiso 1 1 calc R . .

C40 C -0.01309(13) 0.3088(4) -0.1633(2) 0.0312(13) Uani 1 1 d . . .

H40 H -0.0111 0.3779 -0.1760 0.037 Uiso 1 1 calc R . .

C41 C 0.09293(13) 0.2689(4) -0.0444(2) 0.0265(12) Uani 1 1 d . A .

C42 C 0.14257(13) 0.2539(5) -0.0965(2) 0.0324(13) Uani 1 1 d . A .

C43 C 0.14883(15) 0.3610(5) -0.0877(2) 0.0406(15) Uani 1 1 d . . .

H43 H 0.1372 0.3989 -0.0695 0.049 Uiso 1 1 calc R . .

C44 C 0.17152(17) 0.4156(5) -0.1045(3) 0.0510(17) Uani 1 1 d . . .

H44 H 0.1752 0.4900 -0.0978 0.061 Uiso 1 1 calc R . .

C45 C 0.18845(17) 0.3636(6) -0.1303(3) 0.0571(19) Uani 1 1 d . . .

H45 H 0.2040 0.4012 -0.1419 0.068 Uiso 1 1 calc R . .

C46 C 0.1831(2) 0.2579(6) -0.1396(3) 0.074(2) Uani 1 1 d . . .

H46 H 0.1955 0.2210 -0.1569 0.088 Uiso 1 1 calc R . .

C47 C 0.15935(19) 0.2014(6) -0.1239(3) 0.067(2) Uani 1 1 d . . .

H47 H 0.1549 0.1278 -0.1322 0.080 Uiso 1 1 calc R . .

C48 C 0.08891(13) 0.0894(4) -0.1165(2) 0.0273(12) Uani 1 1 d . A .

C49 C 0.07957(15) -0.0052(4) -0.0993(2) 0.0351(14) Uani 1 1 d . . .

H49 H 0.0887 -0.0200 -0.0619 0.042 Uiso 1 1 calc R . .

C50 C 0.05722(18) -0.0780(5) -0.1355(3) 0.0501(17) Uani 1 1 d . . .

H50 H 0.0507 -0.1418 -0.1232 0.060 Uiso 1 1 calc R . .

C51 C 0.0446(2) -0.0577(6) -0.1893(3) 0.082(3) Uani 1 1 d . . .

H51 H 0.0295 -0.1083 -0.2144 0.098 Uiso 1 1 calc R . .

C52 C 0.0534(3) 0.0346(7) -0.2069(3) 0.097(3) Uani 1 1 d . . .

H52 H 0.0444 0.0479 -0.2443 0.116 Uiso 1 1 calc R . .

C53 C 0.0755(2) 0.1097(6) -0.1707(3) 0.062(2) Uani 1 1 d . . .

H53 H 0.0812 0.1744 -0.1833 0.074 Uiso 1 1 calc R . .

C54 C 0.21946(16) 0.0915(6) 0.0306(3) 0.066(2) Uani 1 1 d . A .

H54A H 0.2207 0.1475 0.0066 0.099 Uiso 1 1 calc R . .

H54B H 0.2380 0.0381 0.0360 0.099 Uiso 1 1 calc R . .

H54C H 0.2233 0.1230 0.0653 0.099 Uiso 1 1 calc R . .

C55 C 0.1715(2) -0.0534(7) -0.0584(3) 0.091(3) Uani 1 1 d . A .

H55A H 0.1478 -0.0872 -0.0752 0.137 Uiso 1 1 calc R . .

H55B H 0.1901 -0.1086 -0.0465 0.137 Uiso 1 1 calc R . .

H55C H 0.1749 -0.0067 -0.0845 0.137 Uiso 1 1 calc R . .

C56 C 0.17097(19) -0.0679(5) 0.0503(3) 0.068(2) Uani 1 1 d . A .

H56A H 0.1709 -0.0279 0.0809 0.102 Uiso 1 1 calc R . .

H56B H 0.1915 -0.1168 0.0628 0.102 Uiso 1 1 calc R . .

H56C H 0.1487 -0.1088 0.0335 0.102 Uiso 1 1 calc R . .

C57 C -0.0475(3) 0.3008(18) -0.0474(7) 0.058(6) Uani 0.57(3) 1 d PDU A 1

H57A H -0.0445 0.3003 -0.0814 0.070 Uiso 0.57(3) 1 calc PR A 1

H57B H -0.0479 0.3757 -0.0361 0.070 Uiso 0.57(3) 1 calc PR A 1

C58 C -0.0798(3) 0.2455(18) -0.0535(7) 0.063(5) Uani 0.57(3) 1 d PDU A 1

H58A H -0.0861 0.1912 -0.0822 0.076 Uiso 0.57(3) 1 calc PR A 1

H58B H -0.0999 0.2964 -0.0632 0.076 Uiso 0.57(3) 1 calc PR A 1

C59 C -0.0727(3) 0.1942(16) -0.0018(7) 0.048(5) Uani 0.57(3) 1 d PDU A 1

H59A H -0.0777 0.1168 -0.0067 0.057 Uiso 0.57(3) 1 calc PR A 1

H59B H -0.0879 0.2260 0.0144 0.057 Uiso 0.57(3) 1 calc PR A 1

C60 C -0.0323(3) 0.214(2) 0.0346(6) 0.053(6) Uani 0.57(3) 1 d PDU A 1

H60A H -0.0289 0.2737 0.0599 0.064 Uiso 0.57(3) 1 calc PR A 1

H60B H -0.0204 0.1493 0.0549 0.064 Uiso 0.57(3) 1 calc PR A 1

O1 O -0.0193(3) 0.241(3) -0.0063(12) 0.046(8) Uani 0.57(3) 1 d PDU A 1

C57A C -0.0470(3) 0.3094(17) -0.0451(8) 0.053(8) Uani 0.43(3) 1 d PDU A 2

H57C H -0.0493 0.2745 -0.0787 0.064 Uiso 0.43(3) 1 calc PR A 2

H57D H -0.0426 0.3865 -0.0473 0.064 Uiso 0.43(3) 1 calc PR A 2

C58A C -0.0793(4) 0.2926(17) -0.0363(9) 0.043(5) Uani 0.43(3) 1 d PDU A 2

H58C H -0.0981 0.2585 -0.0682 0.051 Uiso 0.43(3) 1 calc PR A 2

H58D H -0.0886 0.3619 -0.0302 0.051 Uiso 0.43(3) 1 calc PR A 2

C59A C -0.0701(6) 0.224(2) 0.0109(11) 0.066(7) Uani 0.43(3) 1 d PDU A 2

H59C H -0.0881 0.1664 0.0034 0.079 Uiso 0.43(3) 1 calc PR A 2

H59D H -0.0691 0.2657 0.0420 0.079 Uiso 0.43(3) 1 calc PR A 2

C60A C -0.0329(4) 0.1758(17) 0.0227(10) 0.049(7) Uani 0.43(3) 1 d PDU A 2

H60C H -0.0184 0.1655 0.0616 0.059 Uiso 0.43(3) 1 calc PR A 2

H60D H -0.0349 0.1074 0.0036 0.059 Uiso 0.43(3) 1 calc PR A 2

O1A O -0.0184(3) 0.262(4) 0.0006(15) 0.035(7) Uani 0.43(3) 1 d PDU A 2

C61 C 0.2175(2) 0.6872(7) 0.8763(4) 0.110(4) Uani 1 1 d DU . .

H61A H 0.2194 0.6115 0.8858 0.165 Uiso 1 1 calc R . .

H61B H 0.2260 0.6983 0.8482 0.165 Uiso 1 1 calc R . .

H61C H 0.1924 0.7100 0.8630 0.165 Uiso 1 1 calc R . .

C62 C 0.2404(3) 0.7529(7) 0.9259(5) 0.155(5) Uani 1 1 d DU . .

H62A H 0.2658 0.7492 0.9314 0.186 Uiso 1 1 calc R . .

H62B H 0.2328 0.8284 0.9195 0.186 Uiso 1 1 calc R . .

C63 C 0.2377(3) 0.7153(8) 0.9753(5) 0.174(7) Uani 1 1 d DU . .

H63A H 0.2450 0.6395 0.9818 0.209 Uiso 1 1 calc R . .

H63B H 0.2125 0.7205 0.9705 0.209 Uiso 1 1 calc R . .

N1 N 0.16093(11) 0.3916(3) 0.07783(17) 0.0325(11) Uani 1 1 d . A .

N2 N 0.14264(11) 0.1245(3) -0.01237(17) 0.0296(10) Uani 1 1 d . A .

P1 P 0.09547(3) 0.17326(11) 0.11460(6) 0.0268(3) Uani 1 1 d D . .

P2 P 0.15556(4) 0.32977(11) 0.12559(6) 0.0288(4) Uani 1 1 d . . .

P3 P 0.05593(3) 0.34138(10) -0.07873(5) 0.0236(3) Uani 1 1 d . . .

P4 P 0.11619(3) 0.18537(11) -0.06611(5) 0.0260(3) Uani 1 1 d . . .

S1 S 0.05996(4) 0.08635(11) 0.05196(6) 0.0342(4) Uani 1 1 d . A .

S2 S 0.04244(4) 0.42245(11) -0.02519(5) 0.0296(3) Uani 1 1 d . A .

Si1 Si 0.18983(5) 0.48798(14) 0.07529(7) 0.0424(5) Uani 1 1 d . . .

Si2 Si 0.17451(4) 0.02678(14) 0.00039(7) 0.0454(5) Uani 1 1 d . . .

Li1 Li 0.1035(2) 0.1482(7) 0.0191(4) 0.032(2) Uani 1 1 d . A .

Li3 Li 0.1041(2) 0.3646(7) 0.0283(4) 0.032(2) Uani 1 1 d . A .

Li2 Li 0.0291(3) 0.2553(8) 0.0089(4) 0.052(3) Uani 1 1 d D . .

Li4 Li 0.1554(3) 0.2571(9) 0.0331(4) 0.053(3) Uani 1 1 d . A .

 

loop_

 _atom_site_aniso_label

 _atom_site_aniso_U_11

 _atom_site_aniso_U_22

 _atom_site_aniso_U_33

 _atom_site_aniso_U_23

 _atom_site_aniso_U_13

 _atom_site_aniso_U_12

C1 0.034(7) 0.029(7) 0.036(8) 0.017(6) 0.018(6) 0.012(6)

C2 0.046(8) 0.063(10) 0.057(10) 0.013(8) 0.023(8) 0.003(7)

C3 0.074(10) 0.036(8) 0.076(13) 0.035(9) 0.008(11) 0.016(8)

C4 0.083(12) 0.054(11) 0.078(11) 0.030(9) -0.004(9) 0.020(9)

C5 0.090(10) 0.078(11) 0.047(9) 0.024(8) -0.002(7) -0.016(9)

C6 0.060(8) 0.045(9) 0.028(7) 0.015(6) 0.005(6) 0.005(8)

C1A 0.049(12) 0.048(13) 0.033(10) 0.012(10) 0.022(9) 0.010(10)

C2A 0.046(10) 0.030(9) 0.038(10) 0.021(7) 0.015(9) 0.025(8)

C3A 0.066(13) 0.037(11) 0.084(15) 0.010(11) 0.030(12) 0.026(10)

C4A 0.074(14) 0.053(13) 0.065(15) 0.030(13) 0.010(13) 0.013(11)

C5A 0.081(13) 0.050(13) 0.040(10) 0.031(10) 0.010(9) 0.020(11)

C6A 0.068(12) 0.035(12) 0.056(12) 0.013(9) 0.016(10) 0.013(11)

C7 0.024(3) 0.036(3) 0.021(3) -0.004(2) 0.004(2) -0.006(2)

C8 0.043(3) 0.042(4) 0.040(4) 0.007(3) 0.022(3) -0.004(3)

C9 0.049(4) 0.061(4) 0.043(4) -0.002(3) 0.032(3) -0.006(3)

C10 0.038(3) 0.064(4) 0.039(4) -0.011(3) 0.018(3) 0.005(3)

C11 0.042(3) 0.047(4) 0.039(4) 0.004(3) 0.012(3) 0.010(3)

C12 0.039(3) 0.034(3) 0.035(3) 0.007(3) 0.018(3) 0.001(3)

C13 0.032(3) 0.029(3) 0.016(3) 0.001(2) 0.009(2) 0.000(2)

C14 0.030(3) 0.058(4) 0.027(3) 0.009(3) 0.014(3) 0.005(3)

C15 0.037(3) 0.065(5) 0.034(4) 0.005(3) 0.010(3) 0.007(3)

C16 0.051(4) 0.091(6) 0.054(5) 0.014(4) 0.015(4) 0.039(4)

C17 0.038(4) 0.123(7) 0.047(5) 0.027(5) 0.020(4) 0.031(4)

C18 0.028(4) 0.136(8) 0.049(5) -0.010(5) -0.002(3) -0.001(4)

C19 0.036(4) 0.093(6) 0.046(4) -0.017(4) 0.001(3) -0.007(4)

C20 0.028(3) 0.045(3) 0.019(3) -0.003(3) 0.006(2) -0.009(3)

C21 0.055(4) 0.049(4) 0.029(4) 0.001(3) 0.017(3) -0.004(3)

C22 0.058(4) 0.050(4) 0.051(5) -0.020(3) 0.024(4) 0.001(3)

C23 0.057(4) 0.071(5) 0.039(4) -0.016(4) 0.021(4) 0.006(4)

C24 0.074(5) 0.077(5) 0.025(4) -0.006(3) 0.026(4) 0.011(4)

C25 0.049(4) 0.072(5) 0.023(3) 0.010(3) 0.010(3) 0.011(3)

C26 0.049(4) 0.094(6) 0.109(7) 0.013(5) 0.048(5) -0.007(4)

C27 0.128(8) 0.113(7) 0.050(5) -0.023(5) 0.034(5) -0.090(6)

C28 0.069(5) 0.037(4) 0.067(5) 0.000(3) 0.035(4) -0.017(3)

C29 0.022(3) 0.030(3) 0.023(3) 0.005(2) 0.002(2) 0.005(2)

C30 0.049(4) 0.029(3) 0.032(3) 0.004(3) 0.014(3) -0.002(3)

C31 0.064(4) 0.032(4) 0.055(5) 0.003(3) 0.026(4) -0.008(3)

C32 0.058(4) 0.049(4) 0.048(5) 0.020(3) 0.025(4) 0.000(3)

C33 0.052(4) 0.066(5) 0.027(4) 0.010(3) 0.016(3) -0.007(3)

C34 0.038(3) 0.037(3) 0.023(3) 0.001(3) 0.012(3) -0.001(3)

C35 0.026(3) 0.028(3) 0.027(3) -0.008(2) 0.014(2) 0.005(2)

C36 0.037(3) 0.030(3) 0.030(3) 0.002(2) 0.016(3) -0.004(2)

C37 0.047(4) 0.037(4) 0.052(4) -0.006(3) 0.028(3) -0.010(3)

C38 0.032(3) 0.052(4) 0.042(4) -0.013(3) 0.016(3) -0.011(3)

C39 0.026(3) 0.042(4) 0.032(3) -0.008(3) 0.004(3) -0.002(3)

C40 0.033(3) 0.034(3) 0.024(3) -0.004(2) 0.010(3) 0.007(2)

C41 0.028(3) 0.029(3) 0.021(3) 0.000(2) 0.008(2) 0.004(2)

C42 0.024(3) 0.049(4) 0.025(3) -0.002(3) 0.010(2) -0.002(2)

C43 0.045(4) 0.040(4) 0.043(4) -0.004(3) 0.026(3) -0.009(3)

C44 0.056(4) 0.055(4) 0.047(4) -0.009(3) 0.027(4) -0.016(3)

C45 0.040(4) 0.088(6) 0.048(4) -0.011(4) 0.024(3) -0.019(4)

C46 0.084(5) 0.073(6) 0.103(7) -0.027(5) 0.078(5) -0.012(4)

C47 0.080(5) 0.056(5) 0.096(6) -0.035(4) 0.068(5) -0.020(4)

C48 0.027(3) 0.032(3) 0.024(3) 0.000(2) 0.011(2) 0.002(2)

C49 0.046(3) 0.029(3) 0.029(3) -0.001(3) 0.015(3) -0.005(3)

C50 0.072(5) 0.030(3) 0.050(4) -0.009(3) 0.027(4) -0.013(3)

C51 0.125(7) 0.074(5) 0.035(4) -0.022(4) 0.022(5) -0.066(5)

C52 0.154(9) 0.094(6) 0.025(4) -0.014(4) 0.021(5) -0.077(6)

C53 0.084(5) 0.067(5) 0.029(4) -0.001(3) 0.018(4) -0.036(4)

C54 0.040(4) 0.088(6) 0.067(5) 0.007(4) 0.019(4) 0.017(4)

C55 0.102(7) 0.086(6) 0.065(6) -0.013(5) 0.015(5) 0.058(5)

C56 0.068(5) 0.042(4) 0.083(6) 0.017(4) 0.021(4) 0.021(4)

C57 0.053(10) 0.095(13) 0.038(9) 0.044(9) 0.030(8) 0.017(9)

C58 0.048(7) 0.070(11) 0.053(10) 0.033(8) 0.003(7) -0.024(7)

C59 0.044(7) 0.051(8) 0.051(9) 0.003(7) 0.022(6) -0.004(6)

C60 0.033(7) 0.081(13) 0.043(10) 0.018(9) 0.013(6) -0.011(6)

O1 0.040(8) 0.067(19) 0.031(7) 0.006(10) 0.014(6) 0.005(7)

C57A 0.059(14) 0.028(10) 0.053(13) -0.024(9) 0.003(11) 0.021(9)

C58A 0.033(8) 0.042(10) 0.048(10) 0.004(8) 0.011(7) -0.002(7)

C59A 0.061(11) 0.091(15) 0.052(12) 0.029(11) 0.031(9) 0.010(10)

C60A 0.058(11) 0.065(13) 0.020(9) 0.000(9) 0.011(8) -0.008(9)

O1A 0.031(9) 0.034(10) 0.041(13) 0.005(11) 0.016(7) -0.007(6)

C61 0.092(7) 0.084(7) 0.140(10) -0.021(6) 0.035(7) -0.043(5)

C62 0.111(8) 0.055(6) 0.341(18) 0.018(9) 0.138(10) -0.001(6)

C63 0.144(12) 0.085(10) 0.38(2) 0.120(11) 0.193(14) 0.073(7)

N1 0.037(3) 0.039(3) 0.021(3) -0.002(2) 0.012(2) -0.013(2)

N2 0.029(2) 0.028(2) 0.028(3) -0.003(2) 0.009(2) 0.0072(19)

P1 0.0286(7) 0.0262(7) 0.0252(8) 0.0068(6) 0.0110(6) 0.0019(6)

P2 0.0272(7) 0.0368(8) 0.0200(8) 0.0004(6) 0.0077(6) -0.0033(6)

P3 0.0268(7) 0.0224(7) 0.0197(7) 0.0010(6) 0.0080(6) 0.0028(5)

P4 0.0266(7) 0.0272(8) 0.0235(8) -0.0019(6) 0.0098(6) 0.0020(6)

S1 0.0361(8) 0.0281(8) 0.0397(9) -0.0011(6) 0.0172(7) -0.0069(6)

S2 0.0344(7) 0.0293(7) 0.0252(8) -0.0004(6) 0.0124(6) 0.0063(6)

Si1 0.0448(10) 0.0518(11) 0.0338(10) -0.0060(8) 0.0196(8) -0.0218(8)

Si2 0.0342(9) 0.0486(11) 0.0430(11) -0.0067(8) 0.0063(8) 0.0183(8)

Li1 0.036(5) 0.034(5) 0.030(5) -0.001(4) 0.016(4) 0.005(4)

Li3 0.033(5) 0.026(5) 0.028(5) 0.000(4) 0.006(4) 0.005(4)

Li2 0.039(6) 0.054(7) 0.060(8) 0.022(6) 0.016(5) 0.009(5)

Li4 0.061(7) 0.060(7) 0.038(6) -0.021(5) 0.022(5) -0.016(6)

 

_geom_special_details

;

 All esds (except the esd in the dihedral angle between two l.s. planes)

 are estimated using the full covariance matrix.  The cell esds are taken

 into account individually in the estimation of esds in distances, angles

 and torsion angles; correlations between esds in cell parameters are only

 used when they are defined by crystal symmetry.  An approximate (isotropic)

 treatment of cell esds is used for estimating esds involving l.s. planes.

;

 

loop_

 _geom_bond_atom_site_label_1

 _geom_bond_atom_site_label_2

 _geom_bond_distance

 _geom_bond_site_symmetry_2

 _geom_bond_publ_flag

C1 C6 1.382(14) . ?

C1 C2 1.398(13) . ?

C1 P1 1.827(9) . ?

C2 C3 1.367(14) . ?

C3 C4 1.36(2) . ?

C4 C5 1.396(19) . ?

C5 C6 1.391(14) . ?

C1A C6A 1.381(17) . ?

C1A C2A 1.392(16) . ?

C1A P1 1.825(13) . ?

C2A C3A 1.369(16) . ?

C3A C4A 1.37(2) . ?

C4A C5A 1.40(2) . ?

C5A C6A 1.384(16) . ?

C7 C12 1.383(7) . ?

C7 C8 1.399(7) . ?

C7 P1 1.833(5) . ?

C8 C9 1.384(8) . ?

C9 C10 1.390(9) . ?

C10 C11 1.361(8) . ?

C11 C12 1.381(8) . ?

C13 P1 1.677(5) . ?

C13 P2 1.685(5) . ?

C13 Li3 2.211(10) . ?

C13 Li1 2.213(10) . ?

C13 Li4 2.577(12) . ?

C14 C15 1.369(8) . ?

C14 C19 1.394(8) . ?

C14 P2 1.849(5) . ?

C15 C16 1.389(8) . ?

C16 C17 1.371(11) . ?

C17 C18 1.375(11) . ?

C18 C19 1.366(10) . ?

C20 C21 1.389(8) . ?

C20 C25 1.403(8) . ?

C20 P2 1.821(6) . ?

C21 C22 1.391(8) . ?

C22 C23 1.375(9) . ?

C23 C24 1.360(9) . ?

C24 C25 1.369(9) . ?

C26 Si1 1.879(7) . ?

C27 Si1 1.883(7) . ?

C28 Si1 1.858(7) . ?

C29 C34 1.393(7) . ?

C29 C30 1.400(7) . ?

C29 P3 1.826(5) . ?

C30 C31 1.385(8) . ?

C31 C32 1.367(9) . ?

C32 C33 1.365(9) . ?

C33 C34 1.388(8) . ?

C35 C40 1.377(7) . ?

C35 C36 1.408(7) . ?

C35 P3 1.842(5) . ?

C36 C37 1.373(7) . ?

C37 C38 1.388(8) . ?

C38 C39 1.357(8) . ?

C39 C40 1.397(7) . ?

C41 P3 1.680(5) . ?

C41 P4 1.687(5) . ?

C41 Li3 2.206(10) . ?

C41 Li1 2.210(10) . ?

C41 Li4 2.560(12) . ?

C42 C43 1.369(8) . ?

C42 C47 1.383(8) . ?

C42 P4 1.835(5) . ?

C43 C44 1.383(8) . ?

C44 C45 1.352(9) . ?

C45 C46 1.351(9) . ?

C46 C47 1.410(9) . ?

C48 C53 1.377(8) . ?

C48 C49 1.389(7) . ?

C48 P4 1.821(5) . ?

C49 C50 1.378(8) . ?

C50 C51 1.367(9) . ?

C51 C52 1.362(10) . ?

C52 C53 1.394(9) . ?

C54 Si2 1.863(7) . ?

C55 Si2 1.862(8) . ?

C56 Si2 1.865(7) . ?

C57 O1 1.439(11) . ?

C57 C58 1.442(14) . ?

C58 C59 1.474(13) . ?

C59 C60 1.557(15) . ?

C60 O1 1.47(2) . ?

O1 Li2 1.861(13) . ?

C57A O1A 1.439(14) . ?

C57A C58A 1.461(15) . ?

C58A C59A 1.469(15) . ?

C59A C60A 1.543(18) . ?

C60A O1A 1.48(2) . ?

O1A Li2 1.868(15) . ?

C61 C62 1.531(8) . ?

C62 C63 1.485(9) . ?

C63 C63 1.57(2) 7_567 ?

N1 P2 1.617(4) . ?

N1 Si1 1.716(4) . ?

N1 Li4 2.043(11) . ?

N1 Li3 2.179(9) . ?

N2 P4 1.611(4) . ?

N2 Si2 1.719(4) . ?

N2 Li4 2.011(11) . ?

N2 Li1 2.141(10) . ?

P1 S1 2.0416(19) . ?

P1 Li1 2.795(9) . ?

P2 Li3 2.656(8) . ?

P2 Li4 2.697(10) . ?

P3 S2 2.0461(19) . ?

P3 Li3 2.786(9) . ?

P4 Li1 2.644(9) . ?

P4 Li4 2.672(10) . ?

S1 Li1 2.445(9) . ?

S1 Li2 2.498(9) . ?

S2 Li3 2.446(8) . ?

S2 Li2 2.450(10) . ?

Li1 Li4 2.423(14) . ?

Li1 Li3 2.724(13) . ?

Li1 Li2 3.245(13) . ?

Li3 Li4 2.459(14) . ?

Li3 Li2 3.208(14) . ?

 

loop_

 _geom_angle_atom_site_label_1

 _geom_angle_atom_site_label_2

 _geom_angle_atom_site_label_3

 _geom_angle

 _geom_angle_site_symmetry_1

 _geom_angle_site_symmetry_3

 _geom_angle_publ_flag

C6 C1 C2 117.4(10) . . ?

C6 C1 P1 122.4(9) . . ?

C2 C1 P1 119.2(10) . . ?

C3 C2 C1 122.0(14) . . ?

C4 C3 C2 119.6(15) . . ?

C3 C4 C5 121.0(12) . . ?

C6 C5 C4 118.4(14) . . ?

C1 C6 C5 121.6(13) . . ?

C6A C1A C2A 117.8(13) . . ?

C6A C1A P1 121.8(12) . . ?

C2A C1A P1 120.4(12) . . ?

C3A C2A C1A 122.1(17) . . ?

C2A C3A C4A 118.0(18) . . ?

C3A C4A C5A 122.8(16) . . ?

C6A C5A C4A 116.8(17) . . ?

C1A C6A C5A 122.3(17) . . ?

C12 C7 C8 117.9(5) . . ?

C12 C7 P1 119.1(4) . . ?

C8 C7 P1 122.6(4) . . ?

C9 C8 C7 120.4(6) . . ?

C8 C9 C10 120.1(6) . . ?

C11 C10 C9 119.8(6) . . ?

C10 C11 C12 120.2(6) . . ?

C11 C12 C7 121.6(5) . . ?

P1 C13 P2 131.7(3) . . ?

P1 C13 Li3 127.4(4) . . ?

P2 C13 Li3 84.8(3) . . ?

P1 C13 Li1 90.8(3) . . ?

P2 C13 Li1 135.4(4) . . ?

Li3 C13 Li1 76.0(4) . . ?

P1 C13 Li4 148.4(4) . . ?

P2 C13 Li4 75.3(3) . . ?

Li3 C13 Li4 61.3(4) . . ?

Li1 C13 Li4 60.2(3) . . ?

C15 C14 C19 118.4(6) . . ?

C15 C14 P2 118.4(4) . . ?

C19 C14 P2 122.9(5) . . ?

C14 C15 C16 122.1(6) . . ?

C17 C16 C15 118.4(7) . . ?

C16 C17 C18 120.2(6) . . ?

C19 C18 C17 121.1(7) . . ?

C18 C19 C14 119.7(7) . . ?

C21 C20 C25 116.9(6) . . ?

C21 C20 P2 119.9(4) . . ?

C25 C20 P2 123.0(5) . . ?

C20 C21 C22 121.8(6) . . ?

C23 C22 C21 119.9(6) . . ?

C24 C23 C22 118.8(6) . . ?

C23 C24 C25 122.3(6) . . ?

C24 C25 C20 120.4(6) . . ?

C34 C29 C30 118.0(5) . . ?

C34 C29 P3 122.4(4) . . ?

C30 C29 P3 119.1(4) . . ?

C31 C30 C29 120.6(6) . . ?

C32 C31 C30 120.3(6) . . ?

C33 C32 C31 120.2(6) . . ?

C32 C33 C34 120.6(6) . . ?

C33 C34 C29 120.4(5) . . ?

C40 C35 C36 118.8(5) . . ?

C40 C35 P3 123.3(4) . . ?

C36 C35 P3 117.4(4) . . ?

C37 C36 C35 120.6(5) . . ?

C36 C37 C38 120.1(6) . . ?

C39 C38 C37 119.6(5) . . ?

C38 C39 C40 121.3(5) . . ?

C35 C40 C39 119.6(5) . . ?

P3 C41 P4 130.6(3) . . ?

P3 C41 Li3 90.6(3) . . ?

P4 C41 Li3 136.4(3) . . ?

P3 C41 Li1 130.2(4) . . ?

P4 C41 Li1 84.3(3) . . ?

Li3 C41 Li1 76.2(4) . . ?

P3 C41 Li4 148.6(4) . . ?

P4 C41 Li4 74.8(3) . . ?

Li3 C41 Li4 61.6(3) . . ?

Li1 C41 Li4 60.5(4) . . ?

C43 C42 C47 117.6(5) . . ?

C43 C42 P4 118.8(4) . . ?

C47 C42 P4 123.3(5) . . ?

C42 C43 C44 122.0(6) . . ?

C45 C44 C43 120.2(6) . . ?

C46 C45 C44 119.5(7) . . ?

C45 C46 C47 121.0(6) . . ?

C42 C47 C46 119.6(6) . . ?

C53 C48 C49 118.9(5) . . ?

C53 C48 P4 122.6(4) . . ?

C49 C48 P4 118.4(4) . . ?

C50 C49 C48 121.0(6) . . ?

C51 C50 C49 119.6(6) . . ?

C52 C51 C50 120.3(6) . . ?

C51 C52 C53 120.8(7) . . ?

C48 C53 C52 119.5(6) . . ?

O1 C57 C58 103.9(12) . . ?

C57 C58 C59 107.3(10) . . ?

C58 C59 C60 105.9(9) . . ?

O1 C60 C59 100.2(13) . . ?

C57 O1 C60 106.9(14) . . ?

C57 O1 Li2 124.1(9) . . ?

C60 O1 Li2 123.0(14) . . ?

O1A C57A C58A 105.3(12) . . ?

C57A C58A C59A 108.3(12) . . ?

C58A C59A C60A 106.3(13) . . ?

O1A C60A C59A 99.5(15) . . ?

C57A O1A C60A 109.6(16) . . ?

C57A O1A Li2 123.7(12) . . ?

C60A O1A Li2 119.8(16) . . ?

C63 C62 C61 112.8(9) . . ?

C62 C63 C63 110.1(11) . 7_567 ?

P2 N1 Si1 134.7(3) . . ?

P2 N1 Li4 94.2(4) . . ?

Si1 N1 Li4 117.4(4) . . ?

P2 N1 Li3 87.5(3) . . ?

Si1 N1 Li3 131.5(3) . . ?

Li4 N1 Li3 71.2(4) . . ?

P4 N2 Si2 133.4(3) . . ?

P4 N2 Li4 94.4(4) . . ?

Si2 N2 Li4 119.0(4) . . ?

P4 N2 Li1 88.4(3) . . ?

Si2 N2 Li1 130.8(3) . . ?

Li4 N2 Li1 71.3(4) . . ?

C13 P1 C1A 114.1(10) . . ?

C13 P1 C1 114.8(7) . . ?

C1A P1 C1 8.9(9) . . ?

C13 P1 C7 117.0(2) . . ?

C1A P1 C7 108.2(8) . . ?

C1 P1 C7 101.0(7) . . ?

C13 P1 S1 109.07(19) . . ?

C1A P1 S1 103.2(8) . . ?

C1 P1 S1 110.5(5) . . ?

C7 P1 S1 103.84(16) . . ?

C13 P1 Li1 52.4(2) . . ?

C1A P1 Li1 112.5(8) . . ?

C1 P1 Li1 120.4(6) . . ?

C7 P1 Li1 138.2(2) . . ?

S1 P1 Li1 58.26(19) . . ?

N1 P2 C13 104.1(2) . . ?

N1 P2 C20 111.1(2) . . ?

C13 P2 C20 115.1(2) . . ?

N1 P2 C14 110.2(2) . . ?

C13 P2 C14 112.9(3) . . ?

C20 P2 C14 103.6(3) . . ?

N1 P2 Li3 55.1(3) . . ?

C13 P2 Li3 56.0(3) . . ?

C20 P2 Li3 106.6(3) . . ?

C14 P2 Li3 149.6(3) . . ?

N1 P2 Li4 49.1(3) . . ?

C13 P2 Li4 67.5(3) . . ?

C20 P2 Li4 157.3(3) . . ?

C14 P2 Li4 95.1(3) . . ?

Li3 P2 Li4 54.7(3) . . ?

C41 P3 C29 115.2(2) . . ?

C41 P3 C35 116.2(2) . . ?

C29 P3 C35 104.6(2) . . ?

C41 P3 S2 108.62(19) . . ?

C29 P3 S2 106.97(18) . . ?

C35 P3 S2 104.45(16) . . ?

C41 P3 Li3 52.3(2) . . ?

C29 P3 Li3 115.0(2) . . ?

C35 P3 Li3 139.8(3) . . ?

S2 P3 Li3 58.44(19) . . ?

N2 P4 C41 103.6(2) . . ?

N2 P4 C48 110.3(2) . . ?

C41 P4 C48 114.8(2) . . ?

N2 P4 C42 109.8(2) . . ?

C41 P4 C42 113.6(3) . . ?

C48 P4 C42 104.9(2) . . ?

N2 P4 Li1 54.1(2) . . ?

C41 P4 Li1 56.3(3) . . ?

C48 P4 Li1 105.6(3) . . ?

C42 P4 Li1 149.1(3) . . ?

N2 P4 Li4 48.6(3) . . ?

C41 P4 Li4 67.6(3) . . ?

C48 P4 Li4 155.8(3) . . ?

C42 P4 Li4 95.0(3) . . ?

Li1 P4 Li4 54.2(3) . . ?

P1 S1 Li1 76.5(2) . . ?

P1 S1 Li2 89.3(3) . . ?

Li1 S1 Li2 82.1(3) . . ?

P3 S2 Li3 76.1(2) . . ?

P3 S2 Li2 91.3(3) . . ?

Li3 S2 Li2 81.9(3) . . ?

N1 Si1 C28 107.9(3) . . ?

N1 Si1 C26 108.8(3) . . ?

C28 Si1 C26 108.0(4) . . ?

N1 Si1 C27 116.8(3) . . ?

C28 Si1 C27 107.2(4) . . ?

C26 Si1 C27 107.9(4) . . ?

N2 Si2 C55 116.1(3) . . ?

N2 Si2 C54 107.9(3) . . ?

C55 Si2 C54 108.4(4) . . ?

N2 Si2 C56 108.4(3) . . ?

C55 Si2 C56 107.2(4) . . ?

C54 Si2 C56 108.5(3) . . ?

N2 Li1 C41 73.1(3) . . ?

N2 Li1 C13 115.5(4) . . ?

C41 Li1 C13 103.4(4) . . ?

N2 Li1 Li4 51.8(3) . . ?

C41 Li1 Li4 66.9(4) . . ?

C13 Li1 Li4 67.4(4) . . ?

N2 Li1 S1 153.5(5) . . ?

C41 Li1 S1 125.2(4) . . ?

C13 Li1 S1 81.2(3) . . ?

Li4 Li1 S1 148.5(5) . . ?

N2 Li1 P4 37.52(19) . . ?

C41 Li1 P4 39.4(2) . . ?

C13 Li1 P4 127.3(4) . . ?

Li4 Li1 P4 63.5(3) . . ?

S1 Li1 P4 146.0(4) . . ?

N2 Li1 Li3 101.3(4) . . ?

C41 Li1 Li3 51.8(3) . . ?

C13 Li1 Li3 52.0(3) . . ?

Li4 Li1 Li3 56.7(4) . . ?

S1 Li1 Li3 105.1(4) . . ?

P4 Li1 Li3 84.8(3) . . ?

N2 Li1 P1 143.1(4) . . ?

C41 Li1 P1 127.0(4) . . ?

C13 Li1 P1 36.87(19) . . ?

Li4 Li1 P1 103.4(4) . . ?

S1 Li1 P1 45.26(16) . . ?

P4 Li1 P1 162.9(4) . . ?

Li3 Li1 P1 78.5(3) . . ?

N2 Li1 Li2 149.7(4) . . ?

C41 Li1 Li2 77.4(3) . . ?

C13 Li1 Li2 78.0(3) . . ?

Li4 Li1 Li2 121.1(5) . . ?

S1 Li1 Li2 49.7(2) . . ?

P4 Li1 Li2 112.3(3) . . ?

Li3 Li1 Li2 64.3(3) . . ?

P1 Li1 Li2 63.6(3) . . ?

N1 Li3 C41 114.3(4) . . ?

N1 Li3 C13 72.7(3) . . ?

C41 Li3 C13 103.6(4) . . ?

N1 Li3 S2 153.8(4) . . ?

C41 Li3 S2 81.2(3) . . ?

C13 Li3 S2 126.1(4) . . ?

N1 Li3 Li4 51.8(3) . . ?

C41 Li3 Li4 66.3(4) . . ?

C13 Li3 Li4 66.7(4) . . ?

S2 Li3 Li4 147.5(5) . . ?

N1 Li3 P2 37.46(18) . . ?

C41 Li3 P2 126.6(4) . . ?

C13 Li3 P2 39.18(19) . . ?

S2 Li3 P2 147.1(4) . . ?

Li4 Li3 P2 63.5(3) . . ?

N1 Li3 Li1 100.3(4) . . ?

C41 Li3 Li1 52.0(3) . . ?

C13 Li3 Li1 52.0(3) . . ?

S2 Li3 Li1 105.8(4) . . ?

Li4 Li3 Li1 55.4(4) . . ?

P2 Li3 Li1 84.3(3) . . ?

N1 Li3 P3 140.8(4) . . ?

C41 Li3 P3 37.08(18) . . ?

C13 Li3 P3 128.8(4) . . ?

S2 Li3 P3 45.47(15) . . ?

Li4 Li3 P3 102.3(4) . . ?

P2 Li3 P3 163.2(4) . . ?

Li1 Li3 P3 79.8(3) . . ?

N1 Li3 Li2 150.9(4) . . ?

C41 Li3 Li2 78.3(3) . . ?

C13 Li3 Li2 78.8(3) . . ?

S2 Li3 Li2 49.1(2) . . ?

Li4 Li3 Li2 121.2(4) . . ?

P2 Li3 Li2 113.6(4) . . ?

Li1 Li3 Li2 65.7(3) . . ?

P3 Li3 Li2 64.7(3) . . ?

O1 Li2 O1A 10(3) . . ?

O1 Li2 S2 112.6(9) . . ?

O1A Li2 S2 107.8(10) . . ?

O1 Li2 S1 108.1(9) . . ?

O1A Li2 S1 113.1(10) . . ?

S2 Li2 S1 139.1(4) . . ?

O1 Li2 Li3 160.0(12) . . ?

O1A Li2 Li3 152.0(16) . . ?

S2 Li2 Li3 49.0(2) . . ?

S1 Li2 Li3 91.2(3) . . ?

O1 Li2 Li1 149.4(15) . . ?

O1A Li2 Li1 158.1(16) . . ?

S2 Li2 Li1 91.8(4) . . ?

S1 Li2 Li1 48.3(2) . . ?

Li3 Li2 Li1 49.9(3) . . ?

N2 Li4 N1 171.8(6) . . ?

N2 Li4 Li1 56.9(4) . . ?

N1 Li4 Li1 115.4(5) . . ?

N2 Li4 Li3 115.2(5) . . ?

N1 Li4 Li3 57.0(4) . . ?

Li1 Li4 Li3 67.8(4) . . ?

N2 Li4 C41 67.8(3) . . ?

N1 Li4 C41 105.7(5) . . ?

Li1 Li4 C41 52.6(3) . . ?

Li3 Li4 C41 52.1(3) . . ?

N2 Li4 C13 106.2(5) . . ?

N1 Li4 C13 67.5(3) . . ?

Li1 Li4 C13 52.4(3) . . ?

Li3 Li4 C13 52.0(3) . . ?

C41 Li4 C13 85.0(4) . . ?

N2 Li4 P4 36.9(2) . . ?

N1 Li4 P4 139.3(6) . . ?

Li1 Li4 P4 62.3(3) . . ?

Li3 Li4 P4 89.6(4) . . ?

C41 Li4 P4 37.55(19) . . ?

C13 Li4 P4 112.2(4) . . ?

N2 Li4 P2 139.5(6) . . ?

N1 Li4 P2 36.7(2) . . ?

Li1 Li4 P2 89.6(4) . . ?

Li3 Li4 P2 61.8(3) . . ?

C41 Li4 P2 111.6(4) . . ?

C13 Li4 P2 37.18(19) . . ?

P4 Li4 P2 146.7(5) . . ?

 

_diffrn_measured_fraction_theta_max    0.983

_diffrn_reflns_theta_full              25.20

_diffrn_measured_fraction_theta_full   0.983

_refine_diff_density_max    1.190

_refine_diff_density_min   -0.774

_refine_diff_density_rms    0.182


#===END 


data_scw15

 

_audit_creation_method            SHELXL-97

_chemical_name_systematic

;

 ?

;

_chemical_name_common             ?

_chemical_melting_point           ?

_chemical_formula_moiety           'C36 H46 Li N O2 P2 S Si'

_chemical_formula_sum

 'C36 H46 Li N O2 P2 S Si'

_chemical_formula_weight          653.77

 

loop_

 _atom_type_symbol

 _atom_type_description

 _atom_type_scat_dispersion_real

 _atom_type_scat_dispersion_imag

 _atom_type_scat_source

 'C'  'C'   0.0033   0.0016

 'International Tables Vol C Tables 4.2.6.8 and 6.1.1.4'

 'H'  'H'   0.0000   0.0000

 'International Tables Vol C Tables 4.2.6.8 and 6.1.1.4'

 'Li'  'Li'  -0.0003   0.0001

 'International Tables Vol C Tables 4.2.6.8 and 6.1.1.4'

 'N'  'N'   0.0061   0.0033

 'International Tables Vol C Tables 4.2.6.8 and 6.1.1.4'

 'Si'  'Si'   0.0817   0.0704

 'International Tables Vol C Tables 4.2.6.8 and 6.1.1.4'

 'P'  'P'   0.1023   0.0942

 'International Tables Vol C Tables 4.2.6.8 and 6.1.1.4'

 'S'  'S'   0.1246   0.1234

 'International Tables Vol C Tables 4.2.6.8 and 6.1.1.4'

 'O'  'O'   0.0106   0.0060

 'International Tables Vol C Tables 4.2.6.8 and 6.1.1.4'

 

_symmetry_cell_setting            Triclinic

_symmetry_space_group_name_H-M    P-1

 

loop_

 _symmetry_equiv_pos_as_xyz

 'x, y, z'

 '-x, -y, -z'

 

_cell_length_a                    10.2337(4)

_cell_length_b                    13.6527(5)

_cell_length_c                    13.8046(5)

_cell_angle_alpha                 80.610(2)

_cell_angle_beta                  73.134(2)

_cell_angle_gamma                 82.871(2)

_cell_volume                      1815.02(12)

_cell_formula_units_Z             2

_cell_measurement_temperature     173(2)

_cell_measurement_reflns_used     5575

_cell_measurement_theta_min       2.48

_cell_measurement_theta_max       28.13

 

_exptl_crystal_description        block

_exptl_crystal_colour             colourless

_exptl_crystal_size_max           0.54

_exptl_crystal_size_mid           0.52

_exptl_crystal_size_min           0.50

_exptl_crystal_density_meas       ?

_exptl_crystal_density_diffrn     1.196

_exptl_crystal_density_method     'not measured'

_exptl_crystal_F_000              696

_exptl_absorpt_coefficient_mu     0.241

_exptl_absorpt_correction_type    multi-scan

_exptl_absorpt_correction_T_min   0.8807

_exptl_absorpt_correction_T_max   0.8888

_exptl_absorpt_process_details    sadabs

 

_exptl_special_details

;

 ?

;

 

_diffrn_ambient_temperature       173(2)

_diffrn_radiation_wavelength      0.71073

_diffrn_radiation_type            MoK\a

_diffrn_radiation_source          'fine-focus sealed tube'

_diffrn_radiation_monochromator   graphite

_diffrn_measurement_device_type   'CCD area detector'

_diffrn_measurement_method        'phi and omega scans'

_diffrn_detector_area_resol_mean  ?

_diffrn_standards_number          ?

_diffrn_standards_interval_count  ?

_diffrn_standards_interval_time   ?

_diffrn_standards_decay_%         ?

_diffrn_reflns_number             37909

_diffrn_reflns_av_R_equivalents   0.0425

_diffrn_reflns_av_sigmaI/netI     0.0454

_diffrn_reflns_limit_h_min        -13

_diffrn_reflns_limit_h_max        13

_diffrn_reflns_limit_k_min        -18

_diffrn_reflns_limit_k_max        18

_diffrn_reflns_limit_l_min        -18

_diffrn_reflns_limit_l_max        18

_diffrn_reflns_theta_min          1.52

_diffrn_reflns_theta_max          29.00

_reflns_number_total              9595

_reflns_number_gt                 6502

_reflns_threshold_expression      >2sigma(I)

 

_computing_data_collection        'Bruker SMART'

_computing_cell_refinement        'Bruker SMART'

_computing_data_reduction         'Bruker SAINT'

_computing_structure_solution     'SHELXS-97 (Sheldrick, 1990)'

_computing_structure_refinement   'SHELXL-97 (Sheldrick, 1997)'

_computing_molecular_graphics     'Bruker SHELXTL'

_computing_publication_material   'Bruker SHELXTL'

 

_refine_special_details

;

 Refinement of F^2^ against ALL reflections.  The weighted R-factor wR and

 goodness of fit S are based on F^2^, conventional R-factors R are based

 on F, with F set to zero for negative F^2^. The threshold expression of

 F^2^ > 2sigma(F^2^) is used only for calculating R-factors(gt) etc. and is

 not relevant to the choice of reflections for refinement.  R-factors based

 on F^2^ are statistically about twice as large as those based on F, and R-

 factors based on ALL data will be even larger.

;

 

_refine_ls_structure_factor_coef  Fsqd

_refine_ls_matrix_type            full

_refine_ls_weighting_scheme       calc

_refine_ls_weighting_details

 'calc w=1/[\s^2^(Fo^2^)+(0.1225P)^2^+2.8592P] where P=(Fo^2^+2Fc^2^)/3'

_atom_sites_solution_primary      direct

_atom_sites_solution_secondary    difmap

_atom_sites_solution_hydrogens    geom

_refine_ls_hydrogen_treatment     constr

_refine_ls_extinction_method      none

_refine_ls_extinction_coef        ?

_refine_ls_number_reflns          9595

_refine_ls_number_parameters      492

_refine_ls_number_restraints      39

_refine_ls_R_factor_all           0.1086

_refine_ls_R_factor_gt            0.0646

_refine_ls_wR_factor_ref          0.2597

_refine_ls_wR_factor_gt           0.1713

_refine_ls_goodness_of_fit_ref    1.137

_refine_ls_restrained_S_all       1.135

_refine_ls_shift/su_max           0.003

_refine_ls_shift/su_mean          0.000

 

loop_

 _atom_site_label

 _atom_site_type_symbol

 _atom_site_fract_x

 _atom_site_fract_y

 _atom_site_fract_z

 _atom_site_U_iso_or_equiv

 _atom_site_adp_type

 _atom_site_occupancy

 _atom_site_symmetry_multiplicity

 _atom_site_calc_flag

 _atom_site_refinement_flags

 _atom_site_disorder_assembly

 _atom_site_disorder_group

O2 O 0.5030(12) 0.3805(7) 0.2161(5) 0.040(3) Uani 0.74(2) 1 d PD A 1

C33 C 0.5260(15) 0.4425(9) 0.1189(7) 0.041(3) Uani 0.74(2) 1 d PD A 1

H33A H 0.4381 0.4665 0.1032 0.050 Uiso 0.74(2) 1 calc PR A 1

H33B H 0.5842 0.4054 0.0636 0.050 Uiso 0.74(2) 1 calc PR A 1

C34 C 0.5976(12) 0.5284(6) 0.1302(8) 0.054(2) Uani 0.74(2) 1 d PD A 1

H34A H 0.6623 0.5530 0.0645 0.065 Uiso 0.74(2) 1 calc PR A 1

H34B H 0.5308 0.5840 0.1547 0.065 Uiso 0.74(2) 1 calc PR A 1

C35 C 0.6727(13) 0.4841(10) 0.2082(9) 0.075(4) Uani 0.74(2) 1 d PD A 1

H35A H 0.7626 0.4505 0.1757 0.090 Uiso 0.74(2) 1 calc PR A 1

H35B H 0.6868 0.5356 0.2462 0.090 Uiso 0.74(2) 1 calc PR A 1

C36 C 0.5792(15) 0.4121(8) 0.2754(7) 0.066(4) Uani 0.74(2) 1 d PD A 1

H36A H 0.6321 0.3542 0.3033 0.080 Uiso 0.74(2) 1 calc PR A 1

H36B H 0.5165 0.4436 0.3332 0.080 Uiso 0.74(2) 1 calc PR A 1

O2A O 0.514(3) 0.3765(16) 0.2147(16) 0.035(9) Uani 0.26(2) 1 d PD A 2

C33A C 0.562(5) 0.432(3) 0.1141(16) 0.046(10) Uani 0.26(2) 1 d PDU A 2

H33C H 0.4850 0.4702 0.0922 0.055 Uiso 0.26(2) 1 calc PR A 2

H33D H 0.6086 0.3856 0.0637 0.055 Uiso 0.26(2) 1 calc PR A 2

C34A C 0.662(4) 0.501(3) 0.1222(18) 0.073(11) Uani 0.26(2) 1 d PDU A 2

H34C H 0.7568 0.4686 0.1085 0.088 Uiso 0.26(2) 1 calc PR A 2

H34D H 0.6612 0.5633 0.0744 0.088 Uiso 0.26(2) 1 calc PR A 2

C35A C 0.608(4) 0.5205(18) 0.2322(16) 0.060(7) Uani 0.26(2) 1 d PD A 2

H35C H 0.6814 0.5376 0.2584 0.072 Uiso 0.26(2) 1 calc PR A 2

H35D H 0.5334 0.5748 0.2400 0.072 Uiso 0.26(2) 1 calc PR A 2

C36A C 0.556(5) 0.424(3) 0.2843(18) 0.083(15) Uani 0.26(2) 1 d PD A 2

H36C H 0.6291 0.3816 0.3084 0.100 Uiso 0.26(2) 1 calc PR A 2

H36D H 0.4777 0.4353 0.3445 0.100 Uiso 0.26(2) 1 calc PR A 2

O1 O 0.5239(17) 0.1571(12) 0.2847(19) 0.044(4) Uani 0.49(2) 1 d PD A 1

C29 C 0.656(3) 0.1518(11) 0.214(3) 0.080(10) Uani 0.49(2) 1 d PD A 1

H29A H 0.7272 0.1595 0.2478 0.095 Uiso 0.49(2) 1 calc PR A 1

H29B H 0.6617 0.2048 0.1555 0.095 Uiso 0.49(2) 1 calc PR A 1

C30 C 0.6765(19) 0.0494(9) 0.1796(13) 0.092(7) Uani 0.49(2) 1 d PD A 1

H30A H 0.7744 0.0268 0.1535 0.111 Uiso 0.49(2) 1 calc PR A 1

H30B H 0.6274 0.0462 0.1282 0.111 Uiso 0.49(2) 1 calc PR A 1

C31 C 0.607(2) -0.0089(11) 0.287(2) 0.106(12) Uani 0.49(2) 1 d PD A 1

H31A H 0.5758 -0.0725 0.2803 0.127 Uiso 0.49(2) 1 calc PR A 1

H31B H 0.6705 -0.0226 0.3309 0.127 Uiso 0.49(2) 1 calc PR A 1

C32 C 0.497(2) 0.0565(14) 0.3269(13) 0.073(7) Uani 0.49(2) 1 d PD A 1

H32A H 0.4788 0.0492 0.4020 0.087 Uiso 0.49(2) 1 calc PR A 1

H32B H 0.4144 0.0400 0.3114 0.087 Uiso 0.49(2) 1 calc PR A 1

O1A O 0.5363(17) 0.1582(9) 0.2665(19) 0.039(4) Uani 0.51(2) 1 d PD A 2

C29A C 0.669(2) 0.1537(11) 0.198(2) 0.059(5) Uani 0.51(2) 1 d PD A 2

H29C H 0.7239 0.2046 0.2079 0.070 Uiso 0.51(2) 1 calc PR A 2

H29D H 0.6651 0.1646 0.1266 0.070 Uiso 0.51(2) 1 calc PR A 2

C30A C 0.7305(12) 0.0504(11) 0.2250(19) 0.106(7) Uani 0.51(2) 1 d PD A 2

H30C H 0.7708 0.0466 0.2827 0.128 Uiso 0.51(2) 1 calc PR A 2

H30D H 0.8008 0.0267 0.1657 0.128 Uiso 0.51(2) 1 calc PR A 2

C31A C 0.600(2) -0.0089(12) 0.256(2) 0.091(8) Uani 0.51(2) 1 d PD A 2

H31C H 0.5855 -0.0317 0.1952 0.109 Uiso 0.51(2) 1 calc PR A 2

H31D H 0.6072 -0.0674 0.3071 0.109 Uiso 0.51(2) 1 calc PR A 2

C32A C 0.4937(12) 0.0594(12) 0.2961(18) 0.065(5) Uani 0.51(2) 1 d PD A 2

H32C H 0.4659 0.0444 0.3715 0.078 Uiso 0.51(2) 1 calc PR A 2

H32D H 0.4136 0.0540 0.2713 0.078 Uiso 0.51(2) 1 calc PR A 2

Li1 Li 0.3917(6) 0.2659(4) 0.2514(4) 0.0326(12) Uani 1 1 d D . .

C1 C 0.2327(4) 0.0533(2) 0.1549(3) 0.0314(7) Uani 1 1 d . A .

C2 C 0.1716(4) 0.0105(3) 0.2529(3) 0.0401(8) Uani 1 1 d . . .

H2 H 0.1050 0.0487 0.2984 0.048 Uiso 1 1 calc R . .

C3 C 0.2073(5) -0.0886(3) 0.2852(3) 0.0486(10) Uani 1 1 d . . .

H3 H 0.1654 -0.1179 0.3528 0.058 Uiso 1 1 calc R . .

C4 C 0.3029(5) -0.1438(3) 0.2195(4) 0.0504(10) Uani 1 1 d . . .

H4 H 0.3288 -0.2109 0.2423 0.060 Uiso 1 1 calc R . .

C5 C 0.3618(4) -0.1030(3) 0.1204(3) 0.0472(9) Uani 1 1 d . . .

H5 H 0.4261 -0.1421 0.0744 0.057 Uiso 1 1 calc R . .

C6 C 0.3263(4) -0.0042(3) 0.0887(3) 0.0393(8) Uani 1 1 d . . .

H6 H 0.3668 0.0244 0.0206 0.047 Uiso 1 1 calc R . .

C7 C 0.1445(4) 0.1834(2) -0.0002(2) 0.0320(7) Uani 1 1 d . A .

C8 C 0.0318(4) 0.1329(3) 0.0067(3) 0.0400(8) Uani 1 1 d . . .

H8 H -0.0170 0.1004 0.0710 0.048 Uiso 1 1 calc R . .

C9 C -0.0101(5) 0.1296(3) -0.0799(3) 0.0451(9) Uani 1 1 d . . .

H9 H -0.0872 0.0948 -0.0747 0.054 Uiso 1 1 calc R . .

C10 C 0.0601(5) 0.1765(3) -0.1728(3) 0.0473(10) Uani 1 1 d . . .

H10 H 0.0317 0.1740 -0.2320 0.057 Uiso 1 1 calc R . .

C11 C 0.1716(5) 0.2273(3) -0.1803(3) 0.0480(10) Uani 1 1 d . . .

H11 H 0.2195 0.2602 -0.2446 0.058 Uiso 1 1 calc R . .

C12 C 0.2144(4) 0.2306(3) -0.0943(3) 0.0407(8) Uani 1 1 d . . .

H12 H 0.2918 0.2653 -0.1000 0.049 Uiso 1 1 calc R . .

C13 C 0.0623(4) 0.2381(3) 0.2013(3) 0.0345(7) Uani 1 1 d . A .

H13 H -0.0280 0.2282 0.2016 0.041 Uiso 1 1 calc R . .

C14 C -0.0906(3) 0.3259(3) 0.3731(2) 0.0322(7) Uani 1 1 d . A .

C15 C -0.1630(4) 0.2422(3) 0.4184(3) 0.0390(8) Uani 1 1 d . . .

H15 H -0.1264 0.1787 0.3987 0.047 Uiso 1 1 calc R . .

C16 C -0.2869(4) 0.2511(4) 0.4911(3) 0.0486(10) Uani 1 1 d . . .

H16 H -0.3357 0.1938 0.5208 0.058 Uiso 1 1 calc R . .

C17 C -0.3409(4) 0.3432(4) 0.5213(3) 0.0528(11) Uani 1 1 d . . .

H17 H -0.4258 0.3492 0.5722 0.063 Uiso 1 1 calc R . .

C18 C -0.2704(4) 0.4255(4) 0.4766(3) 0.0505(10) Uani 1 1 d . . .

H18 H -0.3069 0.4887 0.4972 0.061 Uiso 1 1 calc R . .

C19 C -0.1475(4) 0.4181(3) 0.4026(3) 0.0390(8) Uani 1 1 d . . .

H19 H -0.1013 0.4763 0.3714 0.047 Uiso 1 1 calc R . .

C20 C 0.1222(4) 0.4341(3) 0.2280(3) 0.0350(7) Uani 1 1 d . A .

C21 C 0.0892(5) 0.4753(3) 0.1396(3) 0.0500(10) Uani 1 1 d . . .

H21 H 0.0458 0.4378 0.1075 0.060 Uiso 1 1 calc R . .

C22 C 0.1200(6) 0.5733(4) 0.0968(4) 0.0720(16) Uani 1 1 d . . .

H22 H 0.0964 0.6024 0.0362 0.086 Uiso 1 1 calc R . .

C23 C 0.1841(6) 0.6268(3) 0.1427(5) 0.0717(16) Uani 1 1 d . . .

H23 H 0.2065 0.6925 0.1126 0.086 Uiso 1 1 calc R . .

C24 C 0.2160(5) 0.5869(3) 0.2311(5) 0.0641(14) Uani 1 1 d . . .

H24 H 0.2592 0.6249 0.2629 0.077 Uiso 1 1 calc R . .

C25 C 0.1853(5) 0.4909(3) 0.2740(3) 0.0475(10) Uani 1 1 d . . .

H25 H 0.2073 0.4633 0.3356 0.057 Uiso 1 1 calc R . .

C26 C 0.1382(5) 0.1004(3) 0.5183(3) 0.0452(9) Uani 1 1 d . A .

H26A H 0.0505 0.0917 0.5067 0.068 Uiso 1 1 calc R . .

H26B H 0.1311 0.0845 0.5914 0.068 Uiso 1 1 calc R . .

H26C H 0.2103 0.0557 0.4803 0.068 Uiso 1 1 calc R . .

C27 C 0.0535(5) 0.3140(3) 0.5600(3) 0.0457(9) Uani 1 1 d . A .

H27A H 0.0589 0.3838 0.5291 0.069 Uiso 1 1 calc R . .

H27B H 0.0738 0.3060 0.6261 0.069 Uiso 1 1 calc R . .

H27C H -0.0390 0.2945 0.5700 0.069 Uiso 1 1 calc R . .

C28 C 0.3492(4) 0.2454(4) 0.4967(3) 0.0474(9) Uani 1 1 d . A .

H28A H 0.4222 0.2080 0.4506 0.071 Uiso 1 1 calc R . .

H28B H 0.3459 0.2189 0.5676 0.071 Uiso 1 1 calc R . .

H28C H 0.3674 0.3158 0.4839 0.071 Uiso 1 1 calc R . .

N1 N 0.1948(3) 0.2669(2) 0.3473(2) 0.0336(6) Uani 1 1 d . A .

P1 P 0.19715(9) 0.18611(6) 0.11452(6) 0.0288(2) Uani 1 1 d . . .

P2 P 0.08327(9) 0.30759(6) 0.28783(6) 0.0270(2) Uani 1 1 d . . .

S1 S 0.37213(9) 0.25031(6) 0.07947(6) 0.0342(2) Uani 1 1 d . A .

Si4 Si 0.18127(10) 0.23311(7) 0.47347(7) 0.0327(2) Uani 1 1 d . . .

 

loop_

 _atom_site_aniso_label

 _atom_site_aniso_U_11

 _atom_site_aniso_U_22

 _atom_site_aniso_U_33

 _atom_site_aniso_U_23

 _atom_site_aniso_U_13

 _atom_site_aniso_U_12

O2 0.052(5) 0.045(6) 0.026(4) 0.008(3) -0.013(3) -0.028(4)

C33 0.048(5) 0.042(4) 0.036(4) 0.002(3) -0.014(3) -0.014(3)

C34 0.068(6) 0.050(4) 0.048(4) 0.012(3) -0.020(4) -0.029(4)

C35 0.083(7) 0.094(8) 0.059(6) 0.019(5) -0.032(5) -0.059(6)

C36 0.098(8) 0.067(6) 0.054(6) 0.024(5) -0.053(6) -0.044(5)

O2A 0.023(9) 0.028(13) 0.057(17) -0.009(11) -0.014(9) 0.003(8)

C33A 0.07(2) 0.045(14) 0.027(10) 0.020(9) -0.016(10) -0.035(16)

C34A 0.09(2) 0.076(19) 0.055(13) -0.004(12) 0.001(14) -0.070(17)

C35A 0.072(18) 0.058(13) 0.062(13) -0.018(10) -0.022(12) -0.031(12)

C36A 0.10(2) 0.11(3) 0.039(13) -0.040(16) 0.016(14) -0.07(2)

O1 0.036(6) 0.056(7) 0.031(6) 0.005(4) -0.001(5) -0.008(4)

C29 0.047(11) 0.054(11) 0.10(2) 0.016(9) 0.016(9) 0.007(7)

C30 0.066(10) 0.059(7) 0.100(11) -0.011(7) 0.051(8) 0.014(6)

C31 0.073(12) 0.046(10) 0.14(2) 0.043(11) 0.031(11) 0.014(8)

C32 0.109(15) 0.045(8) 0.042(6) 0.008(5) 0.002(6) 0.001(7)

O1A 0.031(5) 0.028(5) 0.046(9) -0.005(4) 0.008(4) 0.003(3)

C29A 0.031(7) 0.072(13) 0.056(7) -0.002(7) 0.012(6) -0.008(6)

C30A 0.036(6) 0.080(9) 0.175(18) 0.044(10) -0.022(8) 0.002(6)

C31A 0.079(12) 0.069(13) 0.114(16) -0.044(12) 0.008(10) -0.009(10)

C32A 0.032(6) 0.042(7) 0.115(16) 0.016(8) -0.022(7) -0.008(4)

Li1 0.024(3) 0.035(3) 0.037(3) -0.002(2) -0.006(2) -0.004(2)

C1 0.0330(17) 0.0282(15) 0.0335(16) -0.0073(12) -0.0056(13) -0.0094(12)

C2 0.043(2) 0.0401(19) 0.0339(17) -0.0043(15) -0.0045(15) -0.0082(15)

C3 0.050(2) 0.042(2) 0.048(2) 0.0061(17) -0.0076(18) -0.0139(18)

C4 0.049(2) 0.0321(19) 0.068(3) 0.0041(18) -0.016(2) -0.0110(17)

C5 0.044(2) 0.0326(19) 0.063(3) -0.0128(18) -0.0082(19) -0.0024(16)

C6 0.0366(19) 0.0362(18) 0.0416(19) -0.0093(15) -0.0012(15) -0.0073(14)

C7 0.0445(19) 0.0251(15) 0.0285(15) -0.0096(12) -0.0078(13) -0.0083(13)

C8 0.048(2) 0.0362(19) 0.0393(18) -0.0051(15) -0.0138(16) -0.0137(16)

C9 0.053(2) 0.041(2) 0.052(2) -0.0099(17) -0.0282(19) -0.0105(17)

C10 0.066(3) 0.042(2) 0.043(2) -0.0120(16) -0.0283(19) -0.0005(18)

C11 0.064(3) 0.052(2) 0.0298(17) -0.0034(16) -0.0152(17) -0.010(2)

C12 0.048(2) 0.044(2) 0.0322(17) -0.0051(15) -0.0083(15) -0.0154(16)

C13 0.0342(17) 0.0378(18) 0.0352(17) -0.0140(14) -0.0078(13) -0.0093(14)

C14 0.0296(16) 0.0428(19) 0.0256(14) -0.0071(13) -0.0074(12) -0.0059(13)

C15 0.0367(19) 0.046(2) 0.0352(17) -0.0024(15) -0.0098(14) -0.0108(15)

C16 0.037(2) 0.071(3) 0.0368(19) -0.0004(18) -0.0068(16) -0.0179(19)

C17 0.034(2) 0.088(3) 0.0350(19) -0.019(2) -0.0022(15) -0.003(2)

C18 0.042(2) 0.069(3) 0.044(2) -0.028(2) -0.0092(17) 0.0043(19)

C19 0.0342(18) 0.047(2) 0.0371(18) -0.0182(15) -0.0069(14) 0.0023(15)

C20 0.0357(18) 0.0289(16) 0.0355(17) -0.0047(13) -0.0015(14) -0.0033(13)

C21 0.056(3) 0.046(2) 0.046(2) 0.0050(18) -0.0171(19) -0.0069(19)

C22 0.077(4) 0.058(3) 0.063(3) 0.024(2) -0.011(3) 0.001(3)

C23 0.060(3) 0.032(2) 0.103(4) 0.001(2) 0.005(3) -0.005(2)

C24 0.065(3) 0.033(2) 0.086(4) -0.013(2) -0.002(3) -0.012(2)

C25 0.053(2) 0.0324(19) 0.057(2) -0.0127(17) -0.0069(19) -0.0120(17)

C26 0.050(2) 0.041(2) 0.0380(19) 0.0030(16) -0.0025(16) -0.0109(17)

C27 0.058(2) 0.053(2) 0.0283(17) -0.0099(16) -0.0114(16) -0.0073(19)

C28 0.040(2) 0.067(3) 0.0366(19) -0.0001(18) -0.0134(16) -0.0123(18)

N1 0.0367(15) 0.0340(15) 0.0282(13) -0.0046(11) -0.0028(11) -0.0102(12)

P1 0.0333(4) 0.0285(4) 0.0258(4) -0.0078(3) -0.0051(3) -0.0096(3)

P2 0.0299(4) 0.0274(4) 0.0242(4) -0.0066(3) -0.0044(3) -0.0068(3)

S1 0.0366(5) 0.0359(4) 0.0317(4) -0.0089(3) -0.0048(3) -0.0144(3)

Si4 0.0345(5) 0.0371(5) 0.0263(4) -0.0017(4) -0.0074(4) -0.0087(4)

 

_geom_special_details

;

 All esds (except the esd in the dihedral angle between two l.s. planes)

 are estimated using the full covariance matrix.  The cell esds are taken

 into account individually in the estimation of esds in distances, angles

 and torsion angles; correlations between esds in cell parameters are only

 used when they are defined by crystal symmetry.  An approximate (isotropic)

 treatment of cell esds is used for estimating esds involving l.s. planes.

;

 

loop_

 _geom_bond_atom_site_label_1

 _geom_bond_atom_site_label_2

 _geom_bond_distance

 _geom_bond_site_symmetry_2

 _geom_bond_publ_flag

O2 C36 1.426(7) . ?

O2 C33 1.439(8) . ?

O2 Li1 1.964(7) . ?

C33 C34 1.509(9) . ?

C34 C35 1.506(10) . ?

C35 C36 1.471(9) . ?

O2A C36A 1.434(16) . ?

O2A C33A 1.447(15) . ?

O2A Li1 1.988(13) . ?

C33A C34A 1.516(16) . ?

C34A C35A 1.514(17) . ?

C35A C36A 1.470(17) . ?

O1 C29 1.420(13) . ?

O1 C32 1.428(12) . ?

O1 Li1 1.972(12) . ?

C29 C30 1.52(2) . ?

C30 C31 1.58(2) . ?

C31 C32 1.382(14) . ?

O1A C29A 1.414(13) . ?

O1A C32A 1.428(11) . ?

O1A Li1 1.983(10) . ?

C29A C30A 1.504(19) . ?

C30A C31A 1.567(19) . ?

C31A C32A 1.387(14) . ?

Li1 N1 2.065(6) . ?

Li1 S1 2.484(6) . ?

C1 C2 1.380(5) . ?

C1 C6 1.381(5) . ?

C1 P1 1.831(3) . ?

C2 C3 1.392(6) . ?

C3 C4 1.368(6) . ?

C4 C5 1.378(6) . ?

C5 C6 1.386(5) . ?

C7 C12 1.384(5) . ?

C7 C8 1.388(5) . ?

C7 P1 1.822(3) . ?

C8 C9 1.391(5) . ?

C9 C10 1.373(6) . ?

C10 C11 1.378(6) . ?

C11 C12 1.389(5) . ?

C13 P1 1.708(4) . ?

C13 P2 1.715(3) . ?

C14 C19 1.393(5) . ?

C14 C15 1.397(5) . ?

C14 P2 1.840(3) . ?

C15 C16 1.376(5) . ?

C16 C17 1.388(7) . ?

C17 C18 1.372(7) . ?

C18 C19 1.376(5) . ?

C20 C21 1.374(5) . ?

C20 C25 1.394(5) . ?

C20 P2 1.827(3) . ?

C21 C22 1.406(7) . ?

C22 C23 1.369(9) . ?

C23 C24 1.365(9) . ?

C24 C25 1.381(6) . ?

C26 Si4 1.880(4) . ?

C27 Si4 1.877(4) . ?

C28 Si4 1.868(4) . ?

N1 P2 1.588(3) . ?

N1 Si4 1.697(3) . ?

P1 S1 1.9893(12) . ?

 

loop_

 _geom_angle_atom_site_label_1

 _geom_angle_atom_site_label_2

 _geom_angle_atom_site_label_3

 _geom_angle

 _geom_angle_site_symmetry_1

 _geom_angle_site_symmetry_3

 _geom_angle_publ_flag

C36 O2 C33 109.5(5) . . ?

C36 O2 Li1 127.7(5) . . ?

C33 O2 Li1 122.7(5) . . ?

O2 C33 C34 104.8(6) . . ?

C35 C34 C33 103.6(7) . . ?

C36 C35 C34 102.5(7) . . ?

O2 C36 C35 107.8(6) . . ?

C36A O2A C33A 107.2(12) . . ?

C36A O2A Li1 126.4(12) . . ?

C33A O2A Li1 126.0(11) . . ?

O2A C33A C34A 106.4(14) . . ?

C35A C34A C33A 102.4(16) . . ?

C36A C35A C34A 102.1(16) . . ?

O2A C36A C35A 109.3(15) . . ?

C29 O1 C32 105.7(10) . . ?

C29 O1 Li1 116.8(17) . . ?

C32 O1 Li1 127.2(14) . . ?

O1 C29 C30 105.9(15) . . ?

C29 C30 C31 96.4(15) . . ?

C32 C31 C30 102.8(13) . . ?

C31 C32 O1 111.0(11) . . ?

C29A O1A C32A 108.4(9) . . ?

C29A O1A Li1 123.5(15) . . ?

C32A O1A Li1 116.4(13) . . ?

O1A C29A C30A 104.6(12) . . ?

C29A C30A C31A 100.2(12) . . ?

C32A C31A C30A 104.1(11) . . ?

C31A C32A O1A 110.2(10) . . ?

O2 Li1 O1 101.3(8) . . ?

O2 Li1 O1A 99.0(7) . . ?

O1 Li1 O1A 7.1(13) . . ?

O2 Li1 O2A 3.3(12) . . ?

O1 Li1 O2A 98.1(11) . . ?

O1A Li1 O2A 95.7(11) . . ?

O2 Li1 N1 123.7(5) . . ?

O1 Li1 N1 116.8(7) . . ?

O1A Li1 N1 123.0(7) . . ?

O2A Li1 N1 126.5(9) . . ?

O2 Li1 S1 99.7(3) . . ?

O1 Li1 S1 107.1(8) . . ?

O1A Li1 S1 101.1(8) . . ?

O2A Li1 S1 99.7(6) . . ?

N1 Li1 S1 106.2(2) . . ?

C2 C1 C6 119.1(3) . . ?

C2 C1 P1 120.7(3) . . ?

C6 C1 P1 120.1(3) . . ?

C1 C2 C3 120.2(4) . . ?

C4 C3 C2 119.9(4) . . ?

C3 C4 C5 120.6(4) . . ?

C4 C5 C6 119.2(4) . . ?

C1 C6 C5 120.9(4) . . ?

C12 C7 C8 119.2(3) . . ?

C12 C7 P1 121.5(3) . . ?

C8 C7 P1 119.3(3) . . ?

C7 C8 C9 120.4(4) . . ?

C10 C9 C8 120.0(4) . . ?

C9 C10 C11 120.0(4) . . ?

C10 C11 C12 120.4(4) . . ?

C7 C12 C11 120.1(4) . . ?

P1 C13 P2 122.7(2) . . ?

C19 C14 C15 118.4(3) . . ?

C19 C14 P2 122.7(3) . . ?

C15 C14 P2 118.5(3) . . ?

C16 C15 C14 120.5(4) . . ?

C15 C16 C17 120.4(4) . . ?

C18 C17 C16 119.2(4) . . ?

C17 C18 C19 121.1(4) . . ?

C18 C19 C14 120.3(4) . . ?

C21 C20 C25 119.0(4) . . ?

C21 C20 P2 121.7(3) . . ?

C25 C20 P2 119.2(3) . . ?

C20 C21 C22 119.7(5) . . ?

C23 C22 C21 120.0(5) . . ?

C24 C23 C22 120.7(4) . . ?

C23 C24 C25 119.7(5) . . ?

C24 C25 C20 120.8(5) . . ?

P2 N1 Si4 131.81(19) . . ?

P2 N1 Li1 112.2(2) . . ?

Si4 N1 Li1 115.8(2) . . ?

C13 P1 C7 108.05(17) . . ?

C13 P1 C1 111.89(16) . . ?

C7 P1 C1 101.80(15) . . ?

C13 P1 S1 115.99(12) . . ?

C7 P1 S1 110.47(12) . . ?

C1 P1 S1 107.73(12) . . ?

N1 P2 C13 118.13(17) . . ?

N1 P2 C20 106.76(16) . . ?

C13 P2 C20 111.04(17) . . ?

N1 P2 C14 113.22(15) . . ?

C13 P2 C14 103.69(16) . . ?

C20 P2 C14 103.04(16) . . ?

P1 S1 Li1 101.58(13) . . ?

N1 Si4 C28 108.77(16) . . ?

N1 Si4 C27 114.54(17) . . ?

C28 Si4 C27 105.0(2) . . ?

N1 Si4 C26 112.55(17) . . ?

C28 Si4 C26 107.7(2) . . ?

C27 Si4 C26 107.83(19) . . ?

 

_diffrn_measured_fraction_theta_max    0.994

_diffrn_reflns_theta_full              29.00

_diffrn_measured_fraction_theta_full   0.994

_refine_diff_density_max    0.648

_refine_diff_density_min   -1.255

_refine_diff_density_rms    0.124


#===END 


data_scw22m

 

_audit_creation_method            SHELXL-97

_chemical_name_systematic

;

 ?

;

_chemical_name_common             ?

_chemical_melting_point           ?

_chemical_formula_moiety          'C28 H31 N P2 S Si, C3.5 H4'

_chemical_formula_sum

 'C31.50 H35 N P2 S Si'

_chemical_formula_weight          549.70

 

loop_

 _atom_type_symbol

 _atom_type_description

 _atom_type_scat_dispersion_real

 _atom_type_scat_dispersion_imag

 _atom_type_scat_source

 'C'  'C'   0.0033   0.0016

 'International Tables Vol C Tables 4.2.6.8 and 6.1.1.4'

 'H'  'H'   0.0000   0.0000

 'International Tables Vol C Tables 4.2.6.8 and 6.1.1.4'

 'N'  'N'   0.0061   0.0033

 'International Tables Vol C Tables 4.2.6.8 and 6.1.1.4'

 'Si'  'Si'   0.0817   0.0704

 'International Tables Vol C Tables 4.2.6.8 and 6.1.1.4'

 'P'  'P'   0.1023   0.0942

 'International Tables Vol C Tables 4.2.6.8 and 6.1.1.4'

 'S'  'S'   0.1246   0.1234

 'International Tables Vol C Tables 4.2.6.8 and 6.1.1.4'

 

_symmetry_cell_setting            Monoclinic

_symmetry_space_group_name_H-M    C2/c

 

loop_

 _symmetry_equiv_pos_as_xyz

 'x, y, z'

 '-x, y, -z+1/2'

 'x+1/2, y+1/2, z'

 '-x+1/2, y+1/2, -z+1/2'

 '-x, -y, -z'

 'x, -y, z-1/2'

 '-x+1/2, -y+1/2, -z'

 'x+1/2, -y+1/2, z-1/2'

 

_cell_length_a                    36.0248(15)

_cell_length_b                    15.8353(6)

_cell_length_c                    11.0960(4)

_cell_angle_alpha                 90.00

_cell_angle_beta                  106.504(4)

_cell_angle_gamma                 90.00

_cell_volume                      6069.1(4)

_cell_formula_units_Z             8

_cell_measurement_temperature     173(2)

_cell_measurement_reflns_used     5939

_cell_measurement_theta_min       0.00

_cell_measurement_theta_max       0.00

 

_exptl_crystal_description        plate

_exptl_crystal_colour             colourless

_exptl_crystal_size_max           0.34

_exptl_crystal_size_mid           0.30

_exptl_crystal_size_min           0.20

_exptl_crystal_density_meas       ?

_exptl_crystal_density_diffrn     1.203

_exptl_crystal_density_method     'not measured'

_exptl_crystal_F_000              2328

_exptl_absorpt_coefficient_mu     0.272

_exptl_absorpt_correction_type    multi-scan

_exptl_absorpt_correction_T_min   0.9131

_exptl_absorpt_correction_T_max   0.9476

_exptl_absorpt_process_details    sadabs

 

_exptl_special_details

;

 ?

;

 

_diffrn_ambient_temperature       173(2)

_diffrn_radiation_wavelength      0.71073

_diffrn_radiation_type            MoK\a

_diffrn_radiation_source          'fine-focus sealed tube'

_diffrn_radiation_monochromator   graphite

_diffrn_measurement_device_type   'CCD area detector'

_diffrn_measurement_method        'phi and omega scans'

_diffrn_detector_area_resol_mean  ?

_diffrn_standards_number          ?

_diffrn_standards_interval_count  ?

_diffrn_standards_interval_time   ?

_diffrn_standards_decay_%         ?

_diffrn_reflns_number             45386

_diffrn_reflns_av_R_equivalents   0.0579

_diffrn_reflns_av_sigmaI/netI     0.0405

_diffrn_reflns_limit_h_min        -44

_diffrn_reflns_limit_h_max        44

_diffrn_reflns_limit_k_min        -19

_diffrn_reflns_limit_k_max        19

_diffrn_reflns_limit_l_min        -13

_diffrn_reflns_limit_l_max        13

_diffrn_reflns_theta_min          1.18

_diffrn_reflns_theta_max          26.10

_reflns_number_total              5996

_reflns_number_gt                 4433

_reflns_threshold_expression      >2sigma(I)

 

_computing_data_collection        'Bruker SMART'

_computing_cell_refinement        'Bruker SMART'

_computing_data_reduction         'Bruker SAINT'

_computing_structure_solution     'SHELXS-97 (Sheldrick, 1990)'

_computing_structure_refinement   'SHELXL-97 (Sheldrick, 1997)'

_computing_molecular_graphics     'Bruker SHELXTL'

_computing_publication_material   'Bruker SHELXTL'

 

_refine_special_details

;

 Refinement of F^2^ against ALL reflections.  The weighted R-factor wR and

 goodness of fit S are based on F^2^, conventional R-factors R are based

 on F, with F set to zero for negative F^2^. The threshold expression of

 F^2^ > 2sigma(F^2^) is used only for calculating R-factors(gt) etc. and is

 not relevant to the choice of reflections for refinement.  R-factors based

 on F^2^ are statistically about twice as large as those based on F, and R-

 factors based on ALL data will be even larger.

;

 

_refine_ls_structure_factor_coef  Fsqd

_refine_ls_matrix_type            full

_refine_ls_weighting_scheme       calc

_refine_ls_weighting_details

 'calc w=1/[\s^2^(Fo^2^)+(0.0777P)^2^+7.8616P] where P=(Fo^2^+2Fc^2^)/3'

_atom_sites_solution_primary      direct

_atom_sites_solution_secondary    difmap

_atom_sites_solution_hydrogens    geom

_refine_ls_hydrogen_treatment     constr

_refine_ls_extinction_method      none

_refine_ls_extinction_coef        ?

_refine_ls_number_reflns          5996

_refine_ls_number_parameters      368

_refine_ls_number_restraints      200

_refine_ls_R_factor_all           0.0735

_refine_ls_R_factor_gt            0.0467

_refine_ls_wR_factor_ref          0.1607

_refine_ls_wR_factor_gt           0.1218

_refine_ls_goodness_of_fit_ref    1.152

_refine_ls_restrained_S_all       1.163

_refine_ls_shift/su_max           0.000

_refine_ls_shift/su_mean          0.000

 

loop_

 _atom_site_label

 _atom_site_type_symbol

 _atom_site_fract_x

 _atom_site_fract_y

 _atom_site_fract_z

 _atom_site_U_iso_or_equiv

 _atom_site_adp_type

 _atom_site_occupancy

 _atom_site_symmetry_multiplicity

 _atom_site_calc_flag

 _atom_site_refinement_flags

 _atom_site_disorder_assembly

 _atom_site_disorder_group

C29 C 1.0000 1.0921(8) 0.7500 0.174(6) Uani 0.787(8) 2 d SPDU A 1

H29A H 0.9744 1.1127 0.7500 0.261 Uiso 0.393(4) 1 calc PR A 1

H29B H 1.0062 1.1127 0.6748 0.261 Uiso 0.393(4) 1 calc PR A 1

H29C H 1.0194 1.1127 0.8252 0.261 Uiso 0.393(4) 1 calc PR A 1

C30 C 1.0000 0.9976(5) 0.7500 0.071(2) Uani 0.787(8) 2 d SPDU . 1

C31 C 0.9822(5) 0.9522(4) 0.6444(7) 0.071(2) Uani 0.787(8) 1 d PDU A 1

H31 H 0.9690 0.9815 0.5698 0.085 Uiso 0.787(8) 1 calc PR A 1

C32 C 0.98297(17) 0.8652(4) 0.6435(7) 0.092(2) Uani 0.787(8) 1 d PDU A 1

H32 H 0.9715 0.8349 0.5682 0.111 Uiso 0.787(8) 1 calc PR A 1

C33 C 1.0000 0.8239(8) 0.7500 0.102(3) Uani 0.787(8) 2 d SPDU . 1

H33 H 1.0000 0.7639 0.7500 0.122 Uiso 0.787(8) 2 calc SPR A 1

C29A C 1.0000 0.799(2) 0.7500 0.132(13) Uani 0.213(8) 2 d SPDU A 2

H29D H 0.9735 0.7785 0.7361 0.198 Uiso 0.107(4) 1 calc PR A 2

H29E H 1.0162 0.7785 0.8312 0.198 Uiso 0.107(4) 1 calc PR A 2

H29F H 1.0103 0.7785 0.6827 0.198 Uiso 0.107(4) 1 calc PR A 2

C30A C 1.0000 0.8930(18) 0.7500 0.080(5) Uani 0.213(8) 2 d SPDU . 2

C31A C 0.9826(19) 0.9320(16) 0.635(2) 0.071(5) Uani 0.213(8) 1 d PDU A 2

H31A H 0.9721 0.9015 0.5591 0.086 Uiso 0.213(8) 1 calc PR A 2

C32A C 0.9819(7) 1.0204(16) 0.642(2) 0.078(5) Uani 0.213(8) 1 d PDU A 2

H32A H 0.9685 1.0507 0.5685 0.093 Uiso 0.213(8) 1 calc PR A 2

C33A C 1.0000 1.0668(19) 0.7500 0.100(8) Uani 0.213(8) 2 d SPDU . 2

H33A H 1.0000 1.1268 0.7500 0.120 Uiso 0.213(8) 2 calc SPR A 2

C1 C 0.17742(8) 0.42474(17) 0.1772(3) 0.0274(6) Uani 1 1 d . . .

C2 C 0.16594(9) 0.49274(18) 0.2370(3) 0.0366(7) Uani 1 1 d . . .

H2 H 0.1489 0.4837 0.2872 0.044 Uiso 1 1 calc R . .

C3 C 0.17902(10) 0.57349(19) 0.2244(3) 0.0436(8) Uani 1 1 d . . .

H3 H 0.1710 0.6196 0.2657 0.052 Uiso 1 1 calc R . .

C4 C 0.20390(10) 0.5870(2) 0.1513(3) 0.0438(8) Uani 1 1 d . . .

H4 H 0.2133 0.6422 0.1436 0.053 Uiso 1 1 calc R . .

C5 C 0.21501(9) 0.5200(2) 0.0897(3) 0.0422(8) Uani 1 1 d . . .

H5 H 0.2316 0.5294 0.0382 0.051 Uiso 1 1 calc R . .

C6 C 0.20200(8) 0.43910(18) 0.1029(3) 0.0347(7) Uani 1 1 d . . .

H6 H 0.2099 0.3932 0.0608 0.042 Uiso 1 1 calc R . .

C7 C 0.17649(8) 0.24634(16) 0.1090(2) 0.0251(6) Uani 1 1 d . . .

C8 C 0.21607(8) 0.22973(19) 0.1364(3) 0.0329(6) Uani 1 1 d . . .

H8 H 0.2339 0.2595 0.2022 0.040 Uiso 1 1 calc R . .

C9 C 0.22921(9) 0.1698(2) 0.0676(3) 0.0396(7) Uani 1 1 d . . .

H9 H 0.2562 0.1594 0.0853 0.048 Uiso 1 1 calc R . .

C10 C 0.20353(10) 0.1252(2) -0.0264(3) 0.0422(8) Uani 1 1 d . . .

H10 H 0.2128 0.0841 -0.0731 0.051 Uiso 1 1 calc R . .

C11 C 0.16420(10) 0.1401(2) -0.0530(3) 0.0413(7) Uani 1 1 d . . .

H11 H 0.1464 0.1089 -0.1171 0.050 Uiso 1 1 calc R . .

C12 C 0.15081(8) 0.20089(18) 0.0144(3) 0.0326(6) Uani 1 1 d . . .

H12 H 0.1238 0.2115 -0.0045 0.039 Uiso 1 1 calc R . .

C13 C 0.17965(7) 0.29991(16) 0.3598(2) 0.0239(5) Uani 1 1 d . . .

H13A H 0.1760 0.3504 0.4077 0.029 Uiso 1 1 calc R . .

H13B H 0.2078 0.2955 0.3696 0.029 Uiso 1 1 calc R . .

C14 C 0.12850(7) 0.24606(16) 0.5043(2) 0.0256(6) Uani 1 1 d . . .

C15 C 0.10114(8) 0.30444(19) 0.4411(3) 0.0347(7) Uani 1 1 d . . .

H15 H 0.1015 0.3247 0.3608 0.042 Uiso 1 1 calc R . .

C16 C 0.07326(9) 0.3331(2) 0.4952(3) 0.0414(8) Uani 1 1 d . . .

H16 H 0.0546 0.3733 0.4519 0.050 Uiso 1 1 calc R . .

C17 C 0.07235(9) 0.3038(2) 0.6117(3) 0.0423(8) Uani 1 1 d . . .

H17 H 0.0533 0.3239 0.6487 0.051 Uiso 1 1 calc R . .

C18 C 0.09922(10) 0.2457(2) 0.6733(3) 0.0464(8) Uani 1 1 d . . .

H18 H 0.0983 0.2247 0.7526 0.056 Uiso 1 1 calc R . .

C19 C 0.12768(9) 0.21687(19) 0.6216(3) 0.0347(7) Uani 1 1 d . . .

H19 H 0.1465 0.1775 0.6662 0.042 Uiso 1 1 calc R . .

C20 C 0.14586(8) 0.12920(16) 0.3218(2) 0.0259(6) Uani 1 1 d . . .

C21 C 0.17093(8) 0.07524(17) 0.2831(3) 0.0325(6) Uani 1 1 d . . .

H21 H 0.1981 0.0792 0.3207 0.039 Uiso 1 1 calc R . .

C22 C 0.15635(9) 0.01647(18) 0.1905(3) 0.0383(7) Uani 1 1 d . . .

H22 H 0.1735 -0.0196 0.1635 0.046 Uiso 1 1 calc R . .

C23 C 0.11693(10) 0.0097(2) 0.1365(3) 0.0463(8) Uani 1 1 d . . .

H23 H 0.1069 -0.0312 0.0730 0.056 Uiso 1 1 calc R . .

C24 C 0.09209(10) 0.0623(2) 0.1750(3) 0.0498(9) Uani 1 1 d . . .

H24 H 0.0650 0.0574 0.1379 0.060 Uiso 1 1 calc R . .

C25 C 0.10625(8) 0.1223(2) 0.2671(3) 0.0395(7) Uani 1 1 d . . .

H25 H 0.0889 0.1587 0.2928 0.047 Uiso 1 1 calc R . .

C26 C 0.04310(10) 0.2750(3) -0.0400(3) 0.0582(10) Uani 1 1 d . . .

H26A H 0.0580 0.2429 -0.0858 0.087 Uiso 1 1 calc R . .

H26B H 0.0200 0.2990 -0.0997 0.087 Uiso 1 1 calc R . .

H26C H 0.0352 0.2375 0.0185 0.087 Uiso 1 1 calc R . .

C27 C 0.08830(12) 0.4306(3) -0.0661(4) 0.0621(11) Uani 1 1 d . . .

H27A H 0.1024 0.4800 -0.0230 0.093 Uiso 1 1 calc R . .

H27B H 0.0651 0.4492 -0.1310 0.093 Uiso 1 1 calc R . .

H27C H 0.1050 0.3985 -0.1052 0.093 Uiso 1 1 calc R . .

C28 C 0.04277(11) 0.4254(3) 0.1263(4) 0.0664(12) Uani 1 1 d . . .

H28A H 0.0355 0.3905 0.1890 0.100 Uiso 1 1 calc R . .

H28B H 0.0193 0.4438 0.0624 0.100 Uiso 1 1 calc R . .

H28C H 0.0572 0.4749 0.1675 0.100 Uiso 1 1 calc R . .

N1 N 0.11173(6) 0.32271(14) 0.1615(2) 0.0280(5) Uani 1 1 d . . .

P1 P 0.156429(19) 0.32264(4) 0.19479(6) 0.02335(18) Uani 1 1 d . . .

P2 P 0.166562(19) 0.20835(4) 0.43986(6) 0.02325(18) Uani 1 1 d . . .

S1 S 0.21161(2) 0.16458(5) 0.56872(7) 0.0325(2) Uani 1 1 d . . .

Si1 Si 0.07372(2) 0.36229(6) 0.04994(8) 0.0356(2) Uani 1 1 d . . .

 

loop_

 _atom_site_aniso_label

 _atom_site_aniso_U_11

 _atom_site_aniso_U_22

 _atom_site_aniso_U_33

 _atom_site_aniso_U_23

 _atom_site_aniso_U_13

 _atom_site_aniso_U_12

C29 0.214(14) 0.063(8) 0.245(15) 0.000 0.064(12) 0.000

C30 0.079(5) 0.048(4) 0.087(5) 0.000 0.026(4) 0.000

C31 0.053(3) 0.105(6) 0.051(3) 0.003(4) 0.007(3) 0.004(6)

C32 0.067(4) 0.103(5) 0.124(5) -0.064(4) 0.053(4) -0.039(4)

C33 0.080(6) 0.076(7) 0.176(10) 0.000 0.081(7) 0.000

C29A 0.10(2) 0.13(2) 0.18(2) 0.000 0.053(19) 0.000

C30A 0.059(8) 0.086(9) 0.108(9) 0.000 0.044(8) 0.000

C31A 0.058(8) 0.075(9) 0.086(9) -0.008(8) 0.029(8) 0.000(9)

C32A 0.076(9) 0.078(9) 0.077(9) -0.005(8) 0.017(8) -0.009(8)

C33A 0.108(13) 0.067(14) 0.124(13) 0.000 0.030(12) 0.000

C1 0.0283(13) 0.0263(14) 0.0268(14) 0.0046(11) 0.0062(11) 0.0012(11)

C2 0.0465(17) 0.0286(15) 0.0369(16) 0.0003(13) 0.0152(14) 0.0012(13)

C3 0.062(2) 0.0233(15) 0.0425(18) -0.0002(13) 0.0103(16) 0.0014(14)

C4 0.0536(19) 0.0283(16) 0.0392(17) 0.0087(14) -0.0033(15) -0.0132(14)

C5 0.0413(17) 0.0410(18) 0.0458(18) 0.0125(15) 0.0149(14) -0.0060(14)

C6 0.0421(16) 0.0270(15) 0.0391(16) 0.0054(13) 0.0180(14) 0.0012(12)

C7 0.0337(14) 0.0215(13) 0.0217(13) 0.0025(10) 0.0102(11) 0.0022(11)

C8 0.0326(15) 0.0364(16) 0.0299(15) -0.0023(12) 0.0089(12) 0.0003(12)

C9 0.0341(16) 0.0441(18) 0.0435(18) 0.0009(15) 0.0155(14) 0.0119(14)

C10 0.0500(18) 0.0406(18) 0.0374(17) -0.0071(14) 0.0148(15) 0.0135(15)

C11 0.0504(19) 0.0363(17) 0.0346(17) -0.0108(14) 0.0080(15) 0.0017(14)

C12 0.0346(15) 0.0321(15) 0.0296(15) -0.0017(12) 0.0069(12) 0.0038(12)

C13 0.0242(12) 0.0231(13) 0.0241(13) 0.0006(11) 0.0063(10) 0.0002(10)

C14 0.0276(13) 0.0239(13) 0.0263(13) -0.0021(11) 0.0090(11) -0.0032(11)

C15 0.0337(15) 0.0400(17) 0.0329(16) 0.0032(13) 0.0133(13) 0.0045(13)

C16 0.0369(16) 0.0456(19) 0.0443(19) -0.0005(15) 0.0161(14) 0.0094(14)

C17 0.0401(17) 0.053(2) 0.0402(18) -0.0088(15) 0.0220(15) 0.0005(15)

C18 0.056(2) 0.056(2) 0.0362(17) 0.0046(16) 0.0278(16) 0.0044(17)

C19 0.0424(16) 0.0334(16) 0.0322(15) 0.0049(13) 0.0166(13) 0.0060(13)

C20 0.0306(14) 0.0202(13) 0.0278(14) -0.0006(11) 0.0095(11) -0.0031(11)

C21 0.0336(15) 0.0239(14) 0.0405(16) 0.0002(12) 0.0116(13) 0.0030(11)

C22 0.0502(18) 0.0253(15) 0.0416(17) -0.0030(13) 0.0163(15) 0.0037(13)

C23 0.059(2) 0.0308(16) 0.0450(19) -0.0130(14) 0.0076(16) -0.0095(15)

C24 0.0357(17) 0.052(2) 0.057(2) -0.0215(17) 0.0048(15) -0.0077(15)

C25 0.0296(15) 0.0417(18) 0.0463(18) -0.0141(15) 0.0095(13) -0.0026(13)

C26 0.0343(18) 0.083(3) 0.050(2) -0.012(2) 0.0011(16) -0.0034(18)

C27 0.074(3) 0.059(2) 0.047(2) 0.0169(19) 0.0072(19) 0.006(2)

C28 0.055(2) 0.082(3) 0.057(2) -0.006(2) 0.0080(18) 0.036(2)

N1 0.0298(12) 0.0273(12) 0.0283(12) 0.0017(10) 0.0105(10) 0.0008(9)

P1 0.0259(4) 0.0222(4) 0.0229(4) 0.0003(3) 0.0083(3) 0.0005(3)

P2 0.0236(3) 0.0217(4) 0.0248(4) 0.0006(3) 0.0075(3) -0.0010(3)

S1 0.0285(4) 0.0324(4) 0.0334(4) 0.0072(3) 0.0035(3) 0.0001(3)

Si1 0.0329(4) 0.0424(5) 0.0290(4) 0.0008(4) 0.0048(3) 0.0079(4)

 

_geom_special_details

;

 All esds (except the esd in the dihedral angle between two l.s. planes)

 are estimated using the full covariance matrix.  The cell esds are taken

 into account individually in the estimation of esds in distances, angles

 and torsion angles; correlations between esds in cell parameters are only

 used when they are defined by crystal symmetry.  An approximate (isotropic)

 treatment of cell esds is used for estimating esds involving l.s. planes.

;

 

loop_

 _geom_bond_atom_site_label_1

 _geom_bond_atom_site_label_2

 _geom_bond_distance

 _geom_bond_site_symmetry_2

 _geom_bond_publ_flag

C29 C30 1.496(14) . ?

C29 H29A 0.9800 . ?

C29 H29B 0.9800 . ?

C29 H29C 0.9800 . ?

C30 C31 1.368(6) 2_756 ?

C30 C31 1.368(6) . ?

C31 C32 1.379(7) . ?

C31 H31 0.9500 . ?

C32 C33 1.337(7) . ?

C32 H32 0.9500 . ?

C33 C32 1.337(7) 2_756 ?

C33 H33 0.9500 . ?

C29A C30A 1.49(2) . ?

C29A H29D 0.9800 . ?

C29A H29E 0.9800 . ?

C29A H29F 0.9800 . ?

C30A C31A 1.397(10) 2_756 ?

C30A C31A 1.397(10) . ?

C31A C32A 1.403(10) . ?

C31A H31A 0.9500 . ?

C32A C33A 1.400(10) . ?

C32A H32A 0.9500 . ?

C33A C32A 1.400(10) 2_756 ?

C33A H33A 0.9500 . ?

C1 C2 1.388(4) . ?

C1 C6 1.389(4) . ?

C1 P1 1.819(3) . ?

C2 C3 1.384(4) . ?

C2 H2 0.9500 . ?

C3 C4 1.385(5) . ?

C3 H3 0.9500 . ?

C4 C5 1.381(5) . ?

C4 H4 0.9500 . ?

C5 C6 1.386(4) . ?

C5 H5 0.9500 . ?

C6 H6 0.9500 . ?

C7 C12 1.387(4) . ?

C7 C8 1.396(4) . ?

C7 P1 1.811(3) . ?

C8 C9 1.383(4) . ?

C8 H8 0.9500 . ?

C9 C10 1.377(5) . ?

C9 H9 0.9500 . ?

C10 C11 1.383(4) . ?

C10 H10 0.9500 . ?

C11 C12 1.386(4) . ?

C11 H11 0.9500 . ?

C12 H12 0.9500 . ?

C13 P1 1.820(3) . ?

C13 P2 1.831(3) . ?

C13 H13A 0.9900 . ?

C13 H13B 0.9900 . ?

C14 C15 1.388(4) . ?

C14 C19 1.390(4) . ?

C14 P2 1.818(3) . ?

C15 C16 1.385(4) . ?

C15 H15 0.9500 . ?

C16 C17 1.383(5) . ?

C16 H16 0.9500 . ?

C17 C18 1.370(5) . ?

C17 H17 0.9500 . ?

C18 C19 1.386(4) . ?

C18 H18 0.9500 . ?

C19 H19 0.9500 . ?

C20 C25 1.387(4) . ?

C20 C21 1.397(4) . ?

C20 P2 1.813(3) . ?

C21 C22 1.375(4) . ?

C21 H21 0.9500 . ?

C22 C23 1.380(5) . ?

C22 H22 0.9500 . ?

C23 C24 1.377(5) . ?

C23 H23 0.9500 . ?

C24 C25 1.383(4) . ?

C24 H24 0.9500 . ?

C25 H25 0.9500 . ?

C26 Si1 1.870(4) . ?

C26 H26A 0.9800 . ?

C26 H26B 0.9800 . ?

C26 H26C 0.9800 . ?

C27 Si1 1.868(4) . ?

C27 H27A 0.9800 . ?

C27 H27B 0.9800 . ?

C27 H27C 0.9800 . ?

C28 Si1 1.870(4) . ?

C28 H28A 0.9800 . ?

C28 H28B 0.9800 . ?

C28 H28C 0.9800 . ?

N1 P1 1.547(2) . ?

N1 Si1 1.685(2) . ?

P2 S1 1.9597(10) . ?

 

loop_

 _geom_angle_atom_site_label_1

 _geom_angle_atom_site_label_2

 _geom_angle_atom_site_label_3

 _geom_angle

 _geom_angle_site_symmetry_1

 _geom_angle_site_symmetry_3

 _geom_angle_publ_flag

C30 C29 H29A 109.5 . . ?

C30 C29 H29B 109.5 . . ?

H29A C29 H29B 109.5 . . ?

C30 C29 H29C 109.5 . . ?

H29A C29 H29C 109.5 . . ?

H29B C29 H29C 109.5 . . ?

C31 C30 C31 116.7(8) 2_756 . ?

C31 C30 C29 121.7(4) 2_756 . ?

C31 C30 C29 121.7(4) . . ?

C30 C31 C32 121.7(6) . . ?

C30 C31 H31 119.2 . . ?

C32 C31 H31 119.2 . . ?

C33 C32 C31 119.2(8) . . ?

C33 C32 H32 120.4 . . ?

C31 C32 H32 120.4 . . ?

C32 C33 C32 121.5(11) 2_756 . ?

C32 C33 H33 119.3 2_756 . ?

C32 C33 H33 119.3 . . ?

C30A C29A H29D 109.5 . . ?

C30A C29A H29E 109.5 . . ?

H29D C29A H29E 109.5 . . ?

C30A C29A H29F 109.5 . . ?

H29D C29A H29F 109.5 . . ?

H29E C29A H29F 109.5 . . ?

C31A C30A C31A 128(3) 2_756 . ?

C31A C30A C29A 116.2(16) 2_756 . ?

C31A C30A C29A 116.2(16) . . ?

C30A C31A C32A 114(3) . . ?

C30A C31A H31A 123.2 . . ?

C32A C31A H31A 123.2 . . ?

C33A C32A C31A 124(3) . . ?

C33A C32A H32A 118.0 . . ?

C31A C32A H32A 118.0 . . ?

C32A C33A C32A 117(3) 2_756 . ?

C32A C33A H33A 121.6 2_756 . ?

C32A C33A H33A 121.6 . . ?

C2 C1 C6 118.9(3) . . ?

C2 C1 P1 116.6(2) . . ?

C6 C1 P1 124.3(2) . . ?

C3 C2 C1 120.8(3) . . ?

C3 C2 H2 119.6 . . ?

C1 C2 H2 119.6 . . ?

C2 C3 C4 119.8(3) . . ?

C2 C3 H3 120.1 . . ?

C4 C3 H3 120.1 . . ?

C5 C4 C3 119.9(3) . . ?

C5 C4 H4 120.1 . . ?

C3 C4 H4 120.1 . . ?

C4 C5 C6 120.2(3) . . ?

C4 C5 H5 119.9 . . ?

C6 C5 H5 119.9 . . ?

C5 C6 C1 120.4(3) . . ?

C5 C6 H6 119.8 . . ?

C1 C6 H6 119.8 . . ?

C12 C7 C8 119.1(2) . . ?

C12 C7 P1 117.7(2) . . ?

C8 C7 P1 123.2(2) . . ?

C9 C8 C7 119.9(3) . . ?

C9 C8 H8 120.1 . . ?

C7 C8 H8 120.1 . . ?

C10 C9 C8 120.6(3) . . ?

C10 C9 H9 119.7 . . ?

C8 C9 H9 119.7 . . ?

C9 C10 C11 120.1(3) . . ?

C9 C10 H10 120.0 . . ?

C11 C10 H10 120.0 . . ?

C10 C11 C12 119.7(3) . . ?

C10 C11 H11 120.1 . . ?

C12 C11 H11 120.1 . . ?

C11 C12 C7 120.6(3) . . ?

C11 C12 H12 119.7 . . ?

C7 C12 H12 119.7 . . ?

P1 C13 P2 122.46(14) . . ?

P1 C13 H13A 106.7 . . ?

P2 C13 H13A 106.7 . . ?

P1 C13 H13B 106.7 . . ?

P2 C13 H13B 106.7 . . ?

H13A C13 H13B 106.6 . . ?

C15 C14 C19 119.6(3) . . ?

C15 C14 P2 121.8(2) . . ?

C19 C14 P2 118.6(2) . . ?

C16 C15 C14 119.9(3) . . ?

C16 C15 H15 120.1 . . ?

C14 C15 H15 120.1 . . ?

C17 C16 C15 120.5(3) . . ?

C17 C16 H16 119.7 . . ?

C15 C16 H16 119.7 . . ?

C18 C17 C16 119.4(3) . . ?

C18 C17 H17 120.3 . . ?

C16 C17 H17 120.3 . . ?

C17 C18 C19 121.0(3) . . ?

C17 C18 H18 119.5 . . ?

C19 C18 H18 119.5 . . ?

C18 C19 C14 119.5(3) . . ?

C18 C19 H19 120.2 . . ?

C14 C19 H19 120.2 . . ?

C25 C20 C21 119.5(3) . . ?

C25 C20 P2 122.1(2) . . ?

C21 C20 P2 118.4(2) . . ?

C22 C21 C20 120.1(3) . . ?

C22 C21 H21 120.0 . . ?

C20 C21 H21 120.0 . . ?

C21 C22 C23 120.3(3) . . ?

C21 C22 H22 119.9 . . ?

C23 C22 H22 119.9 . . ?

C24 C23 C22 119.9(3) . . ?

C24 C23 H23 120.1 . . ?

C22 C23 H23 120.1 . . ?

C23 C24 C25 120.6(3) . . ?

C23 C24 H24 119.7 . . ?

C25 C24 H24 119.7 . . ?

C24 C25 C20 119.7(3) . . ?

C24 C25 H25 120.2 . . ?

C20 C25 H25 120.2 . . ?

Si1 C26 H26A 109.5 . . ?

Si1 C26 H26B 109.5 . . ?

H26A C26 H26B 109.5 . . ?

Si1 C26 H26C 109.5 . . ?

H26A C26 H26C 109.5 . . ?

H26B C26 H26C 109.5 . . ?

Si1 C27 H27A 109.5 . . ?

Si1 C27 H27B 109.5 . . ?

H27A C27 H27B 109.5 . . ?

Si1 C27 H27C 109.5 . . ?

H27A C27 H27C 109.5 . . ?

H27B C27 H27C 109.5 . . ?

Si1 C28 H28A 109.5 . . ?

Si1 C28 H28B 109.5 . . ?

H28A C28 H28B 109.5 . . ?

Si1 C28 H28C 109.5 . . ?

H28A C28 H28C 109.5 . . ?

H28B C28 H28C 109.5 . . ?

P1 N1 Si1 138.54(15) . . ?

N1 P1 C7 114.77(13) . . ?

N1 P1 C1 114.23(12) . . ?

C7 P1 C1 107.24(12) . . ?

N1 P1 C13 112.96(12) . . ?

C7 P1 C13 105.00(12) . . ?

C1 P1 C13 101.40(12) . . ?

C20 P2 C14 108.04(12) . . ?

C20 P2 C13 107.87(12) . . ?

C14 P2 C13 104.93(12) . . ?

C20 P2 S1 111.59(9) . . ?

C14 P2 S1 112.97(9) . . ?

C13 P2 S1 111.11(9) . . ?

N1 Si1 C27 113.16(15) . . ?

N1 Si1 C28 109.31(14) . . ?

C27 Si1 C28 108.9(2) . . ?

N1 Si1 C26 110.51(15) . . ?

C27 Si1 C26 107.40(18) . . ?

C28 Si1 C26 107.41(19) . . ?

 

_diffrn_measured_fraction_theta_max    0.994

_diffrn_reflns_theta_full              26.10

_diffrn_measured_fraction_theta_full   0.994

_refine_diff_density_max    0.531

_refine_diff_density_min   -0.686

_refine_diff_density_rms    0.164
